# 1 **Australia as a global sink for the genetic diversity of avian** 2 **influenza A virus**

3  
4  
5 Running head: Avian influenza in Australia  
6  
7

8 Michelle Wille<sup>1,2,3\*</sup>, Victoria (Tiggy) Grillo<sup>4</sup>, Silvia Ban de Gouvea Pedroso<sup>4</sup>, Graham W.  
9 Burgess<sup>5</sup>, Allison Crawley<sup>6</sup>, Celia Dickason<sup>6</sup>, Philip M. Hansbro<sup>7</sup>, Md. Ahasanul Hoque<sup>8</sup>,  
10 Paul F Horwood<sup>5</sup>, Peter D Kirkland<sup>9</sup>, Nina Yu-Hsin Kung<sup>10</sup>, Stacey E. Lynch<sup>11</sup>, Sue  
11 Martin<sup>12</sup>, Michaela McArthur<sup>13</sup>, Kim O'Riley<sup>11</sup>, Andrew J Read<sup>9</sup>, Simone Warner<sup>11</sup>, Bethany  
12 J. Hoye<sup>14</sup>, Simeon Lisovski<sup>14</sup>, Trent Leen<sup>15,16</sup>, Aeron C. Hurt<sup>1</sup>, Jeff Butler<sup>17</sup>, Ivano Broz<sup>17</sup>,  
13 Kelly R. Davies<sup>17</sup>, Patrick Mileto<sup>17</sup>, Matthew Neave<sup>17</sup>, Vicky Stevens<sup>17</sup>, Andrew Breed<sup>18,19</sup>,  
14 Tommy T. Y. Lam<sup>20</sup>, Edward C. Holmes<sup>2</sup>, Marcel Klaassen<sup>14</sup>, Frank Y. K. Wong<sup>17,\*</sup>  
15  
16

17 1. WHO Collaborating Centre for Reference and Research on Influenza, at the Peter  
18 Doherty Institute for Infection and Immunity, Melbourne, Victoria, Australia.  
19

20 2. Sydney Institute for Infectious Diseases, School of Life and Environmental Sciences and  
21 School of Medical Sciences, The University of Sydney, Sydney, New South Wales,  
22 Australia.  
23

24 3. Department of Microbiology and Immunology, at the Peter Doherty Institute for Infection  
25 and Immunity, The University of Melbourne, Melbourne, Victoria, Australia.  
26

27 4. Wildlife Health Australia, Mosman, New South Wales, Australia.  
28

29 5. College of Public Health, Medical and Veterinary Sciences, James Cook University,  
30 Townsville, Queensland, Australia.  
31

32 6. Primary Industries and Regions, Adelaide, South Australia, Australia.  
33

34 7. Centre for Inflammation, Centenary Institute and University of Technology Sydney,  
35 School of Life Sciences, Faculty of Science, Sydney NSW, Australia.  
36

37 8. Chattogram (previously Chittagong) Veterinary and Animal Sciences University, Khulshi,  
38 Bangladesh.

39

40 9. NSW Department of Primary Industries, Elizabeth Macarthur Agricultural Institute,  
41 Menangle, New South Wales, Australia.

42

43 10. Animal Biosecurity & Welfare, Biosecurity Queensland, Department of Agriculture and  
44 Fisheries, Health Food Science Precinct, Coopers Plains, Queensland, Australia.

45

46 11. Agriculture Victoria Research, AgriBio Centre for AgriBioscience, Bundoora, Victoria,  
47 Australia.

48

49 12. Department of Primary Industries, Parks, Water and Environment, Tasmania,  
50 Australia.

51

52 13. Department of Primary Industries and Regional Development, Western Australia,  
53 Australia.

54

55 14. Centre for Integrative Ecology, Deakin University, Geelong, Victoria, Australia.

56

57 15. Geelong Field & Game, Geelong, Victoria, Australia

58

59 16. Wetlands Environmental Taskforce. Field & Game Australia, Seymour, Victoria,  
60 Australia

61

62 17. Commonwealth Scientific and Industrial Research Organisation (CSIRO), Australian  
63 Centre for Disease Preparedness, Geelong, Victoria, Australia.

64

65 18. Department of Agriculture, Water and the Environment, Canberra, Australian Capital  
66 Territory, Australia.

67

68 19. University of Queensland, St. Lucia, Queensland, Australia.

69

70 20. State Key Laboratory of Emerging Infectious Diseases, School of Public Health, The  
71 University of Hong Kong, Hong Kong, PR China.

72

73 \*Corresponding authors:

74 Michelle Wille: [michelle.wille@sydney.edu.au](mailto:michelle.wille@sydney.edu.au)

75 Frank Wong: [Frank.Wong@csiro.au](mailto:Frank.Wong@csiro.au)

76 **Abstract**

77

78 Most of our understanding of the ecology and evolution of avian influenza A virus (AIV) in  
79 wild birds is derived from studies conducted in the northern hemisphere on waterfowl, with  
80 a substantial bias towards dabbling ducks. However, relevant environmental conditions  
81 and patterns of avian migration and reproduction are substantially different in the southern  
82 hemisphere. Through the sequencing and analysis of 333 unique AIV genomes collected  
83 from wild birds collected over 15 years we show that Australia is a global sink for AIV  
84 diversity and not integrally linked with the Eurasian gene pool. Rather, AIV are infrequently  
85 introduced to Australia, followed by decades of isolated circulation and eventual extinction.  
86 The number of co-circulating viral lineages varies per subtype. AIV haemagglutinin (HA)  
87 subtypes that are rarely identified at duck-centric study sites (H8-12) had more detected  
88 introductions and contemporary co-circulating lineages in Australia. Combined with a lack  
89 of duck migration beyond the Australian-Papuan region, these findings suggest  
90 introductions by long-distance migratory shorebirds. In addition, we found no evidence of  
91 directional or consistent patterns in virus movement across the Australian continent. This  
92 feature corresponds to patterns of bird movement, whereby waterfowl have nomadic and  
93 erratic rainfall-dependant distributions rather than consistent intra-continental migratory  
94 routes. Finally, we detected high levels of virus gene segment reassortment, with a high  
95 diversity of AIV genome constellations across years and locations. These data, in addition  
96 to those from other studies in Africa and South America, clearly show that patterns of AIV  
97 dynamics in the Southern Hemisphere are distinct from those in the temperate north.

98

99 **Author Summary**

100

101 A result of the ever-growing poultry industry is a dramatic global increase in the incidence  
102 of high pathogenicity avian influenza virus outbreaks. In contrast, wild birds are believed to  
103 be the main reservoir for low pathogenic avian influenza A virus. Due to intensive research  
104 and surveillance of AIV in waterfowl in the Northern Hemisphere, we have a better  
105 understanding of AIV ecology and evolution in that region compared to the Southern  
106 Hemisphere, which are characterised by different patterns of avian migration and  
107 ecological conditions. We analysed 333 unique AIV genomes collected from wild birds in  
108 Australia to understand how Australia fits into global AIV dynamics and how viruses are  
109 maintained and dispersed within the continent of Australia. We show that the Southern

110 Hemisphere experiences differing evolutionary dynamics to those seen in Northern

111 Hemisphere with Australia representing a global sink for AIV.

112

113

114 **Keywords:** Australia; avian influenza; ecology; evolution; influenza A virus; wild birds

## 115 Introduction

116 The evolution of avian influenza virus (AIV) is in part driven by the globally booming poultry  
117 industry that comprises an estimated three quarters of the global avian biomass [1, 2]. This  
118 industry has witnessed a dramatic increase in the incidence of disease outbreaks over the  
119 past two decades caused by high pathogenicity avian influenza virus (HPAIV) [3, 4].  
120 Despite this, wild birds continue to play an important role in AIV ecology and evolution.  
121 Through long distance migration, wild birds have aided in the dispersal of high  
122 pathogenicity H5Nx between Asia, Europe, Africa and North America [5]. Conversely, the  
123 existence of distinct migratory flyways has constrained viruses into consistent phylogenetic  
124 divisions, such as between AIVs detected in the Nearctic and the Palearctic [6].  
125 Aggregations of wild birds vary both geospatially and temporally, often leaving their  
126 hallmarks on AIV prevalence, diversity and evolution [7]. Importantly, most of our  
127 knowledge of AIV ecology and evolution is drawn from studies in temperate northern  
128 hemisphere systems [8-15] even though migration patterns and environmental conditions  
129 relevant for AIV dynamics differ in the southern hemisphere [7].

130

131 Influenza A virus is a segmented, negative-sense RNA virus and the sole member of the  
132 genus *Alphainfluenza* in the family *Orthomyxoviridae* [16]. Wild birds, particularly  
133 *Anseriformes* (ducks, geese and swans), and to a lesser extent *Charadriiformes*  
134 (shorebirds and gulls), are central reservoirs of AIV, with 16 of the 18 HA (haemagglutinin)  
135 and 9 of the 11 NA (neuraminidase) subtypes identified in these taxa [6, 17, 18]. AIVs do  
136 not generally cause high morbidity or mortality in their hosts, with the exception of subtype  
137 H5 and H7 HPAIVs that emerge in poultry [5, 19-21]. In northern hemisphere systems, the  
138 prevalence of AIV peaks in the autumn, driven by the recruitment of immunologically naïve  
139 juvenile avian hosts and population congregations associated with migration [8, 9, 18, 22].  
140 However, disease dynamics may vary in different global regions due to differences in  
141 environmental and host factors [23]. Indeed, despite many parts of Australia being defined  
142 as temperate, annual recruitment of immunologically naïve juvenile waterfowl into avian  
143 populations is irregular due to highly variable climatic conditions which impact breeding  
144 cycles, such that in some years waterfowl may not breed, or breed in small numbers and  
145 in other years may attempt to breed multiple times [24]. Unlike the high prevalence of AIVs  
146 in temperate northern hemisphere waterfowl, prevalence in Australian waterfowl has  
147 consistently been less than 2% with no strong seasonal patterns, however these low  
148 prevalence estimates may be driven by the highly aggregated nature of studies [25-32].  
149 Furthermore, all Australian waterfowl are endemic and largely nomadic, and do not

150 migrate beyond the Australian-Papuan Region [33, 34]. Indeed, of the key AIV reservoir  
151 avian taxa, only members of the *Charadriiformes*, notably the waders (families  
152 *Scolopacidae* and *Charadriidae*), migrate and link Australia with Eurasia and North  
153 America [35-37]. These species may also be less susceptible to AIV infection than some  
154 other species [38]. The ecology of this migratory system has the potential to limit viral gene  
155 flow between Eurasia and Australia and, consequently, it is expected that AIV lineages  
156 may be evolving independently in Australia compared to other continents [27, 39]. Aside  
157 from a small number of studies based on a limited number of AIV sequences [27, 30, 31,  
158 39-43], how these distinct features of host-ecology impact AIV evolution in Australia is  
159 largely unknown.

160

161 To reveal patterns of AIV evolution in wild birds in Australia, we used low pathogenic AIV  
162 (LPAIV) genome data collected over nearly 15 years from all states and territories of  
163 Australia to assess (i) the pattern of gene flow between Australia and other continents i.e.  
164 a source, sink or combination, (ii) the extent and role played by AIV lineage introduction  
165 and maintenance in Australia e.g. local evolution and extinction, and (iii) whether the  
166 population dynamics, migration and reassortment of AIVs in Australia differ from those in  
167 other geographical locations globally. Studying these processes in Australia, which  
168 comprises conditions that are in stark contrast to those found in temperate avian  
169 population systems in the northern hemisphere, will provide key insights into the global  
170 drivers of AIV ecology and evolution.

171

## 172 **Results**

### 173 *Summary of avian influenza viruses sequenced*

174 The data generated here comprised full or partial genomes of 333 unique LPAIV. Briefly, a  
175 total of 397 AIV positive samples collected from 2006 to 2020 were submitted for  
176 sequencing (Table S1). We recovered the full AIV genomes from 242 of the samples. In  
177 some cases, we recovered partial AIV genomes consisting of gene segments with  
178 insufficient sequence length (n=15) or with no sequence (n=76). An analysis of the  
179 influence of Ct value and genome completeness is presented in Fig S1. A small number of  
180 the virus samples comprised mixed infections (n=20), where two different variants of a  
181 segment were detected. Forty-five viruses were sequenced more than once; samples may  
182 have been re-sequenced due to poor quality in the initial attempt and/or in cases where  
183 both the original sample and the corresponding egg isolate were sequenced.. Our analysis  
184 also included additional virus sequences presented in Bhatta *et al.* 2020 (n = 1, individual

185 avian faecal sample in 2018) and Høye *et al.* 2021 (n = 22, combined oropharyngeal  
186 cloacal swabs collected in 2014) as the samples were collected as part of the NAIWB  
187 surveillance program.

188

189 Overall, unique AIV genomes comprising at least one segment characterised were  
190 collected in South Australia (n = 71), Western Australia (n = 75), Tasmania (n = 89,  
191 including [41], Queensland (n = 45), Victoria (n = 46, including [40], New South Wales (n =  
192 15) and the Northern Territory (n = 15) (Fig 1A). These include those collected from avian  
193 cloacal and/or oropharyngeal swab samples or avian faecal samples, and unique  
194 genomes were generated from a combination of original samples (n=222) or isolates  
195 (n=111). Prior to 2013, there were fewer than five sequenced genomes per year. However,  
196 since this time the numbers of virus genomes have steadily increased, with the largest  
197 number of genomes sequenced from samples collected in 2019 (n = 71) (Fig 1). This  
198 increase coincided with a shift by the NAIWB surveillance program from characterising  
199 only H5/H7 viruses towards more comprehensive LPAIV characterisation in Australia. Due  
200 to irregular data collection in some states, large numbers of viral genomes were recovered  
201 from single sampling events (e.g. Western Australia, Tasmania), whereas in other states  
202 we find a more uniform temporal spread of the data (e.g. Victoria) (Fig S2).

203

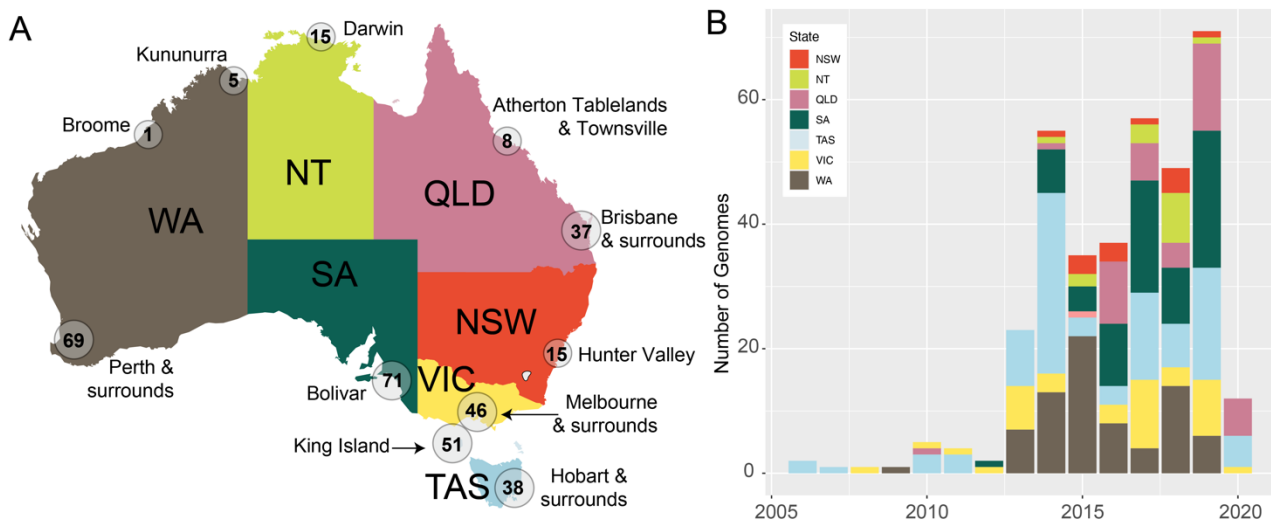

204

205

206 **Figure 1. Spatial and temporal distribution of avian influenza genomes used in this study. (A) Map of**  
207 **Australia illustrating regional sampling locations. Where sampling locations were within 500km, they were**  
208 **merged into a single location. The value within the circle corresponds to the number of unique viral genomes**  
209 **comprising at least one segment from each location. States and Territories are as follows: VIC Victoria, NSW**  
210 **New South Wales, QLD Queensland, NT Northern Territory, WA Western Australia, SA South Australia and**  
211 **TAS Tasmania. (B) Number of genomes per state per year. Colours from panel B correspond to the fill colour**

212 of the state in panel A. This figure includes genomes comprising one or more segments and contains no  
 213 duplicates. This figure includes all sequences generated as part of the National Avian Influenza Wild Bird  
 214 Surveillance Program, including those recently published in [40, 41]. Metadata is available in Table S1 and a  
 215 detailed plot illustrating exact virus sample collection dates and locations can be found in Fig S2.

216

217 Across the data set as a whole, we identified 14 different HA subtypes and all nine  
 218 different NA subtypes, comprising 58 HA-NA combinations. We did not detect avian HA  
 219 subtypes H14 and H15, and only a single case each of H13 and H16. The most common  
 220 subtypes in our data set were H1N1 (n = 14), H3N8 (n = 23), H4N6 (n = 16), H5N3 (n =  
 221 15), H6N2 (n = 23), H9N2 (n = 14) and H11N9 (n =19) (Fig 2A). These subtypes each  
 222 comprised 5-10% of the subtype combinations. An analysis of HA-NA linkage by  
 223 assessing the Pearson's residuals following a Chi-squared test revealed a strong positive  
 224 association between H1-N1, H3-N8, H4-N6, H8-N4, H11-N9 and H12-N5 (Fig 2B). These  
 225 overrepresented subtypes are comparable to those recovered from intensively sampled  
 226 study sites in Europe and North America [8, 10]. In cases in which a HA subtype had  
 227 several different NA subtypes, we saw weak positive or weak negative Pearson residuals  
 228 (e.g. H7). As our data set largely comprised samples collected from wild bird faeces and  
 229 pooled samples, the contribution of avian host species to AIV subtype distribution could  
 230 not be determined.

231

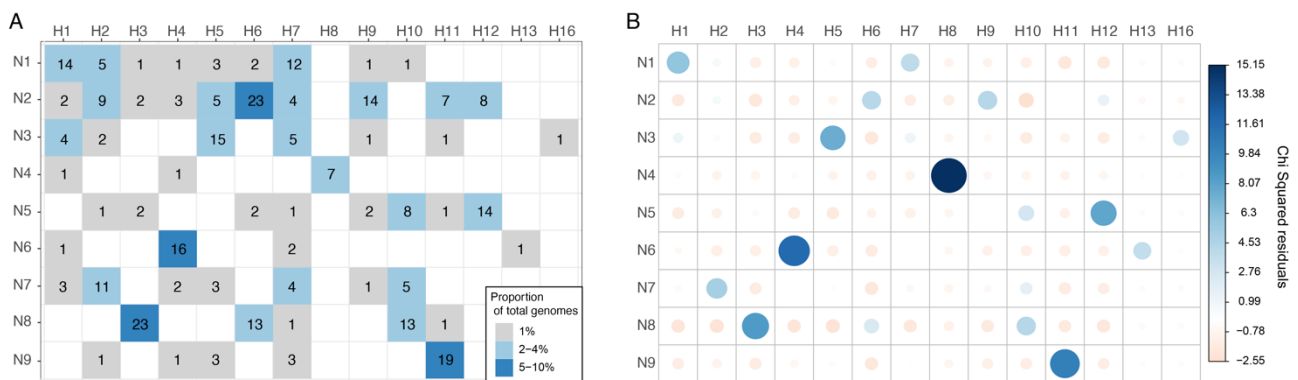

232

233 **Figure 2. HA-NA subtype linkage in data generated for this study. (A) The number of each HA-NA subtype**  
 234 **combinations (values) and the proportion of the total data set these values represent (shading). (B) A plot of**  
 235 **the Pearson residuals of Chi-squared tests. For a given cell, the size of the circle is proportional to the**  
 236 **amount of the cell contribution. Positive residuals are in blue and identify HA and NA subtypes for which**  
 237 **there is a strong positive association in the data set. Negative residuals are in light pink and show a weak**  
 238 **negative association, that is, they are underrepresented in the data set. This figure comprises unique viral**  
 239 **genomes with at least one segment.**

240



241 *Australia is a sink for global AIV diversity*

242 Using the data generated here, we first aimed to determine how AIVs in Australia fit into  
243 patterns of global genetic diversity. Specifically, we asked (i) whether there was one  
244 consistent endemic Australian lineage for each subtype, (ii) how long these endemic  
245 lineages have been maintained, and (ii) whether there is connectivity between Australia  
246 and New Zealand (sequences mined from GenBank) comprising an “Oceania cluster”  
247 within the southern hemisphere temperate zone.

248  
249 Our phylogenetic analysis revealed that sequences from Australia tended to fall into  
250 distinct Australian lineages, although the number of these lineages varied across subtypes  
251 and segments. In the case of the HA segment, sequences from H2-H8 subtypes each  
252 comprised a single contemporary lineage (Fig 3, Fig S4-S9). In contrast, H1, H9-H12 had  
253 more than one contemporary lineage (Fig 3, Fig S3, S10-S12); Subtypes H9 had three,  
254 and H1, H10-H12 each had two, contemporary lineages. In addition to lineages, there was  
255 evidence of at least one H10 and two H11 incursions into Australia without subsequent  
256 establishment (Fig 3, Fig S11). These differences in the number of lineages concur with  
257 the observation that H1-H6 are over-represented at duck-focused study sites as compared  
258 to H8-H12 which are under-represented at duck-focused study sites [e.g. 8]. It has been  
259 proposed that ducks may not be the central reservoir for H8-H12 [44]; based on  
260 phylogenies (Fig 3, Fig S9-S12) there was evidence for more repeated incursions of these  
261 subtypes into Australia.

262  
263 For many lineages in the time-scaled trees, there was a relatively large time gap between  
264 the most recent common ancestor of Australian lineages and the closest reference  
265 sequence (Fig 4). For example, in the Australian H1 lineage represented by four viruses  
266 from 2013 and 2016 (Fig S3), the time to the most recent common ancestor (tMRCA)  
267 ranged from Feb 2011-June 2013 (95% Highest Posterior Density [HPD]; mean at June  
268 2012), whereas their date of separation from the closest reference sequence was between  
269 1999-2003 (mean at June 2001) (Fig S3). This is most likely due to vast under-sampling in  
270 Australia, notably between 2000 and 2012, although sporadic and/or under-sampling of  
271 wild birds in Asia may compound this. Critically, this has implications for accurate dating of  
272 some Australian lineages as it is unclear how distant the introduction of the lineage to  
273 Australia predated the tMRCA of existing diversity (Fig 4). These issues notwithstanding,  
274 the tMRCA of contemporary Australian lineages was 2005 or later, suggesting currently

275 established lineages were introduced to Australia relatively recently (Fig 4). This was  
276 supported by the fact that most of the older Australian lineages, comprising viruses from  
277 the 1970s to 1980s are no longer in circulation. There are some exceptions, such as H7  
278 viruses, that had a tMRCA of between Aug 1974 - Aug 1975. This Australian H7 lineage  
279 has been associated with eight HPAIV poultry outbreaks in Australia since 1976 [45].  
280 Sequence data for this H7 lineage from wild birds has only been available since 2007 due  
281 to very limited sampling and sequencing of wild birds in earlier years (Fig S8).

282  
283 Notably, sequences from Australia and New Zealand did not consistently fall into the same  
284 lineages. There were 42 HA sequences from New Zealand available in GenBank, of which  
285 33 had collection dates of 2004 and later, aligning well with the temporal scale of  
286 contemporary Australia lineages. Indeed, New Zealand lineages of H1, H2, H5, H6, H7  
287 and H10 were each in entirely separate lineages from Australian sequences (Fig S3-S4,  
288 S6-S8, S11). This is likely due to limited bird migration involving some shorebird species,  
289 between New Zealand and Australia [46].

290  
291 Overall, Australia appears to be a sink for Eurasian AIV diversity. Although we identified  
292 multiple viral introductions from Eurasia to Australia, in the entire data set there were only  
293 two examples of viruses from Australia being introduced to Eurasia. These comprised the  
294 H4(N8) subtype (Fig 3B), and one N7 sequence (Fig S21). Notably, each of these events  
295 involved the detection of Australian lineage viruses in Charadriiformes (gulls and  
296 shorebirds) in Japan. Overall, all viral introductions stemmed from Eurasian lineages with  
297 the exception of H10 and H12 that showed introductions from North American lineages.  
298 For H8 and one H9 lineage, the most closely related reference viruses were sampled in  
299 Europe. However, due to possible under-sampling and/or under-representation of viral  
300 diversity in wild birds in Asia it cannot be concluded that these lineages were seeded  
301 directly from Europe (Fig S9-S10).

302

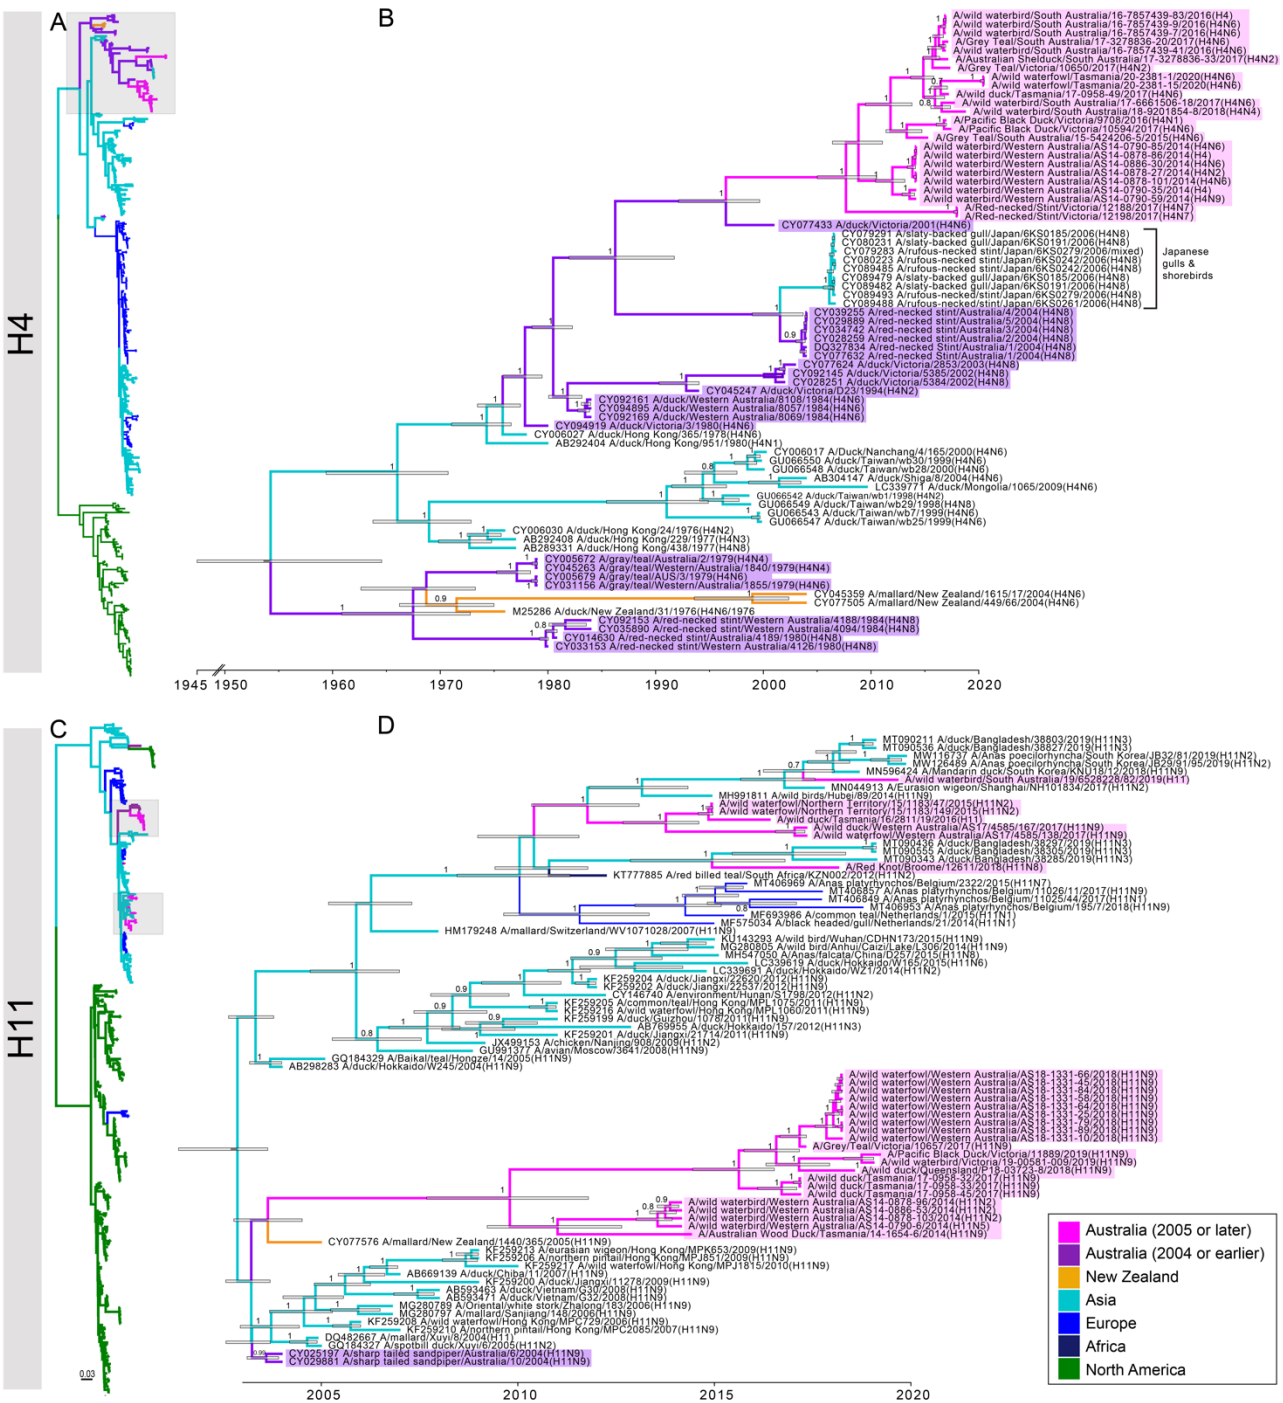

303

304 **Figure 3. Phylogenetic trees of subtypes H4 and H11.** (A, C) Phylogenetic trees comprising global diversity.  
 305 Branches of reference sequences are coloured by continent. Sequences from Australia are coloured in pink  
 306 (2005 and later) and in purple (pre-2005), with 2005 marking the year of the oldest sequence in the data set  
 307 generated in this study. (B, D) Time structured phylogenetic trees. The trees comprise Australian lineages  
 308 (as indicated by grey boxes in A, C) and closest relatives (retrieved by BLAST searches). Branches are  
 309 coloured by year and geography as above. Branch labels correspond to posterior clade probabilities of each  
 310 node, node bars correspond to the 95% HPD of node height. We selected H4 as it is the only HA subtype for  
 311 which there is clear introduction of an Australian lineage virus into Asia (indicated in square parenthesis),  
 312 and is an example of an HA segment for which there is only a single contemporary lineage. We selected H11

313 as it is the subtype with the largest number of contemporary Australian lineages (4), of which 2 are  
 314 represented by a single sequence. Trees for all other HA subtypes can be found in Fig S3-S14

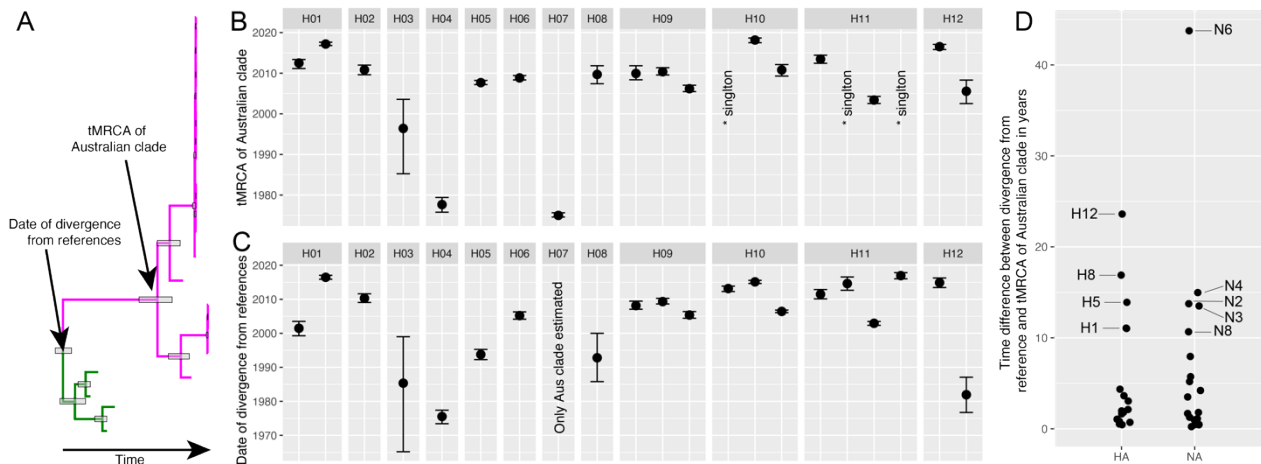

315  
 316  
 317 **Figure 4.** The time-scale of AIV evolution by subtype in Australia. (A) A schematic phylogeny demonstrating  
 318 the differences between the tMRCA of Australian lineages and the dates of divergence from reference  
 319 sequences. (B) The tMRCA distribution of contemporary Australian lineages of the HA segments and (C)  
 320 dates of divergence from the reference sequences of all HA lineages. Points represent the node date and  
 321 bars the 95% HPD. For segments with multiple lineages, multiple estimates have been provided. Where a  
 322 novel introduction is represented by a single sequence the tMRCA was not estimated (here, represented by  
 323 “\*singleton) but the date of divergence from reference sequences is shown. For H7, we did not estimate the  
 324 date of divergence from the closest reference sequences. (D) The time difference between the tMRCA of the  
 325 Australian lineages and the date of separation for all HA and NA segments and lineages. Lineages with time  
 326 differences of more than 10 years are labelled. All HA and NA trees are presented in Fig 3, Fig S3-S23.

### 327 328 *Detection of novel virus segments introduced into Australia*

329  
 330 The relatively long time difference between the tMRCA of Australian lineages and the  
 331 global representative viruses used as reference suggest that the wild bird surveillance  
 332 sampling has been unable to detect the index viruses seeding local lineages (Fig 4).  
 333 However, a small number of viruses in the data set (n = 18) contained gene lineages  
 334 and/or introductions with no further transmission which likely comprise recent introductions  
 335 to Australia. These viruses comprised at least one virus gene segment that either  
 336 represented the only detection of a novel lineage in Australia (*i.e.* singletons) or comprised  
 337 the first detection of an Australian lineage cluster, where the time difference between the  
 338 tMRCA of the identified lineage and date of divergence from global references was small  
 339 (less than 1 year) (Fig 5). These recently introduced viruses were only detected in the  
 340 north of Western Australia, the Northern Territory and Queensland, and from migratory  
 341 shorebirds in Tasmania. Migratory birds would likely use these northern locations as initial

342 stopover sites in Australia, highlighting the importance of surveillance of shorebirds in  
 343 these regions. Notably, we did not find evidence of a complete “novel” virus genome, that  
 344 is all viruses for which whole genome data were available contained at least one gene  
 345 segment belonging to an established Australian lineage. For example, A/Ruddy  
 346 Turnstone/King Island/10938/2017(H12N5) had 7 segments representing the index  
 347 detection of a novel lineage, with only the M segment belonging to an established  
 348 Australian lineage. Interestingly, Ruddy Turnstone viruses in 2018 and 2019 had a number  
 349 of segments falling into lineages for which A/Ruddy Turnstone/King  
 350 Island/10938/2017(H12N5) was basal.

351

|                                                             |                | PB2 | PB1 | PA | HA  | NP | NA | M | NS (A) |
|-------------------------------------------------------------|----------------|-----|-----|----|-----|----|----|---|--------|
| A/Red Knot/Broome/12611/2018(H11N8)                         | 1 March 2018   |     |     |    | H11 |    | N8 |   |        |
| A/wild waterfowl/Northern Territory/15-1183-47/2015(H11N2)  | 14 Dec 2015    |     |     |    | H11 |    | N2 |   |        |
| A/wild waterfowl/Northern Territory/15-1183-149/2015(H11N2) | 14 Dec 2015    |     |     |    | H11 |    | N2 |   |        |
| A/wild duck/Northern Territory/18-0491-262/2018(H9N1)       | 8 June 2018    |     |     |    | H9  |    | N1 |   |        |
| A/wild waterbird/Queensland/P16-10643-18/2016 (H1N1)        | 1 Aug 2016     |     |     |    | H1  |    | N1 |   |        |
| A/wild waterbird/Queensland/P16-10643-19/2016 (H1N1)        | 1 Aug 2016     |     |     |    | H1  |    | N1 |   |        |
| A/wild waterbird/Queensland/P16-10643-20/2016 (H1N1)        | 1 Aug 2016     |     |     |    | H1  |    | N1 |   |        |
| A/wild waterfowl/Queensland/JCU-234/2018(H1N1)              | 18 May 2018    |     |     |    | H1  |    | N1 |   |        |
| A/wild waterbird/Queensland/JCU-272/2019(H5N9)              | 9 Aug 2019     |     |     |    | H5  |    | N9 |   |        |
| A/Ruddy Turnstone/King Island/10938/2017(H12N5)             | 30 March 2017  |     |     |    | H12 |    | N5 |   |        |
| A/Ruddy Turnstone/King Island/XXXX/2019(H12N2) (n=8)        | 24-31 Feb 2019 |     |     |    | H12 |    | N2 |   |        |

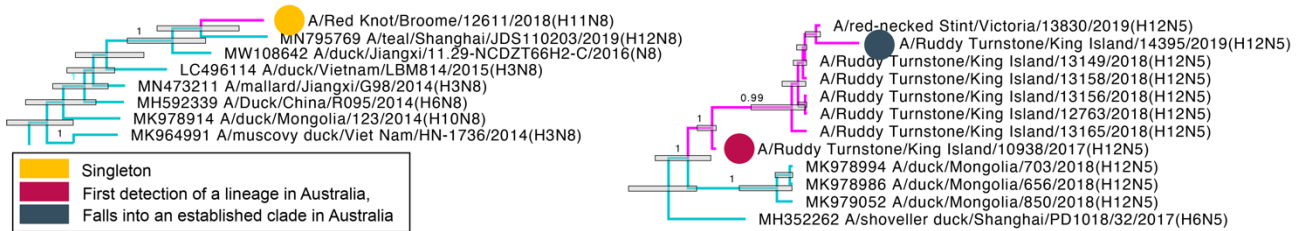

352

353

354 **Figure 5.** Viruses sequenced in this study that have signatures of recent introduction. For each segment,  
 355 coloured tiles correspond to three different statuses: singletons, first detections and well-established  
 356 lineages. Singletons represent the only detections of the lineage in Australia. In cases where two viruses  
 357 from the same sampling effort were identical and were the only detections of that lineage, they were still  
 358 considered a singleton (e.g. the NA segment of the NT/2015 viruses or the NA segment of the 8 H12N2  
 359 Ruddy Turnstone viruses from 2019, which have only ever been detected during that sampling event). Only  
 360 the A allele NS segment was detected in these viruses. Phylogenetic examples (here excerpts from N8 and  
 361 N5) are provided for each status, and branches are coloured as in Fig 3.

362

### 363 AIV circulation within Australia

364 Given that there are no structured flyways within Australia and birds have nomadic  
 365 movements influenced by climate [29, 47], we hypothesized that there would be limited  
 366 geographic structure of AIVs within the continent. To assess this, we analysed possible  
 367 viral “migration events” (Markov Jumps) between sampled locations using the HA and/or  
 368 NA segments comprising Australian lineages with 20 or more sequences (H4, H5, H6, H7,

369 N6, N8), and two independent lineages of the NP segment. These analyses are likely  
370 strongly influenced by both small sample sizes and collection biases, such that we do not  
371 have sequence coverage across all subtypes for all locations and years. However, we also  
372 examined the two larger NP lineages which included substantially more sequences ( $n =$   
373  $197$  and  $n = 85$  sequences) than any of the subtype specific HA or NA data sets and  
374 spanned the entire sampling period and all sample locations.

375

376 Our phylogenetic data revealed potential virus migration events between the sampling  
377 locations in the southeastern states (Victoria, South Australia, New South Wales and  
378 Tasmania) that occurred consistently across all of the gene segments examined (Fig 6).  
379 Using the largest Australian NP gene lineage, we found more than 10 potential migration  
380 events between Victoria and South Australia and between Victoria and Tasmania,  
381 suggesting high levels of connectivity between these sampling locations. We also found  
382 evidence of movement between temperate Western Australia and the southeastern states  
383 (Victoria, South Australia, Tasmania), and between Queensland and the southeastern  
384 states, although this was only detected in the NP segments and in two of the HA/NA  
385 subtypes analysed. As only limited sequences were available from tropical Australia  
386 (northern Queensland, Northern Territory and northeastern Western Australia), migration  
387 events to/from these locations were not well estimated in our analyses. However, for the  
388 largest NP lineage, a number of potential migration events between temperate and tropical  
389 Australia were observed (Fig S26). Potential migration events were also detected between  
390 the sampled tropical locations. Although it is likely that we have underestimated the  
391 migration events due to poor temporal and spatial coverage, the migration events had  
392 strong Bayes Factor support (Fig S25). Importantly, these analyses also did not record  $>1$   
393 migration event or  $>10$  Bayes Factor between all locations that were included in each tree  
394 as a default. For example, despite being included in all eight analyses, we only detected  
395 significant migration events (or  $>10$  Bayes Factor) to/from Western Australia in the H6 and  
396 N6 lineages, and the two NP lineages (Fig 6, Fig S25).

397

398 Overall, analysis suggested Victoria was consistently a net exporter as most migration  
399 events originated from the state. Specifically, Victoria played a role as a net exporter in H5,  
400 H7, N6, N8, and both NP lineages. South Australia also played a role as an exporter (H4,  
401 H6, H7, N6, and both NP lineages), although we detected both import and export events  
402 from this state across most analyses. Temperate Western Australia was a net importer of  
403 AIV, although as with South Australia, we detected both importation and exportation

404 events across the analyses. A positive association between Markov rewards and the  
405 number of exportation events may also be evidence of sampling bias. For example, in the  
406 case of H4, H5 and H7, Victoria had substantially more sequences available as compared  
407 to other sampling locations and was identified as a net exporter. In these cases, the high  
408 number of exportations relative to importation events may be due to sampling biases (Fig  
409 S27).

410  
411 Taking the potential biases in our data set into consideration we did not see consistent  
412 source or sink locations for AIV movements but rather detected numerous exportation and  
413 importation events in most locations. Further, there was no consistent directionality to  
414 patterns of viral dispersal. Rather adjacent locations from which we had many samples  
415 were highly connected. These results are consistent with the absence of flyway structure  
416 within Australia.

417

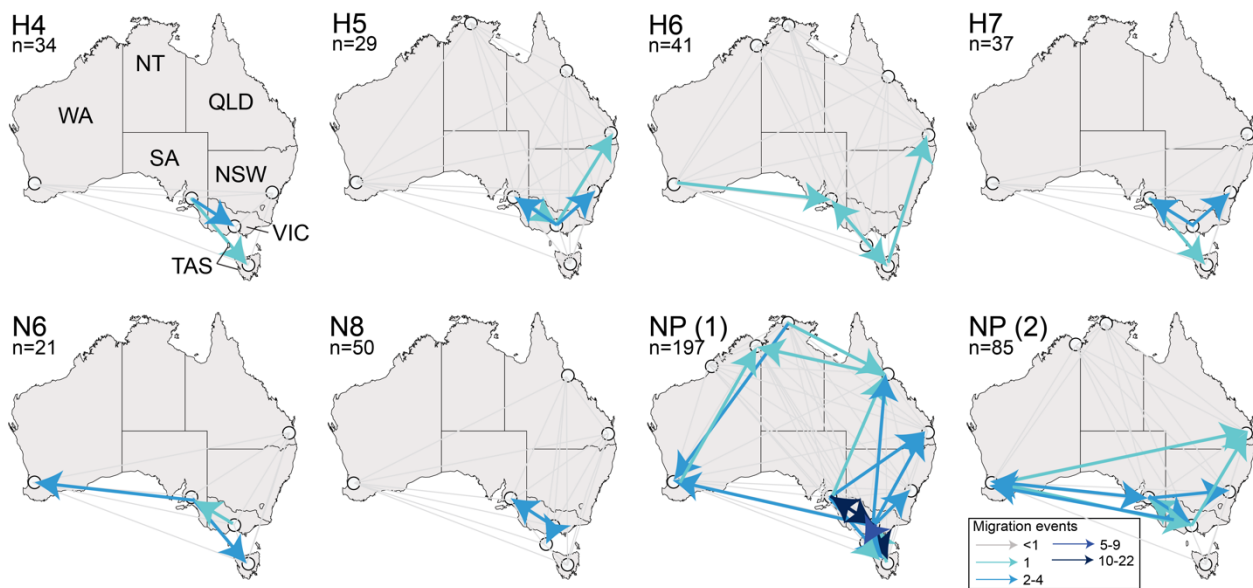

418

419 **Figure 6.** Inferred migration events of avian influenza viruses within Australia. Locations included in each  
420 tree are marked by a white circle. Specific location names are presented in Fig 1A, and all state names are  
421 presented in the first panel and are as follows: VIC Victoria, NSW New South Wales, QLD Queensland, NT  
422 Northern Territory, WA Western Australia, SA South Australia and TAS Tasmania. Grey lines correspond  
423 potential migration events that were not detected in the analysis (i.e. migration event <1). Blue lines indicate  
424 migration events are derived from calculations of state changes (Markov Jumps), ranging from light to dark.  
425 Arrows indicate the direction of the migration event. As NP has more than a single discrete Australian  
426 lineage, we have generated two independent maps reflecting the 2 largest Australian lineages of NP (Fig  
427 S25). Maps illustrating Bayes Factors, also generated using BSSVS can be found in Fig S26, and Markov  
428 rewards also generated in this analysis are presented in Fig S27.

429

430

### 431 *Genomic Reassortment*

432 Despite a low reported prevalence, multiple lineages and subtypes co-circulated at most of  
433 the sampled locations (Fig S28), [e.g. 25]. A number of “mixed” virus samples (*i.e.*  
434 samples comprising at least one segment with two different sequences) were also  
435 detected through sequencing. These mixed virus samples were often detected from  
436 sampling events where a diversity of AIV subtypes were co-detected. The only exceptions  
437 were A/wild duck/New South Wales/M15-10737-MD02/2015(mixed) and A/wild  
438 waterfowl/Queensland/JCU-78-226/2016(mixed) for which other AIV genomes were not  
439 detected in birds collected on the same collection events (Table S2). Next- generation  
440 sequencing of the original samples allows for the detection of mixed viruses.

441

442 Assessment of the diversity of genome constellations indicated prolific reassortment,  
443 similar to that found in other locations that have been studied [13, 14]. In the case of the  
444 H5 and H7 subtypes of veterinary importance, the LPAIV genome data from wild birds  
445 revealed 17 unique constellations from 33 (26 complete) H7 genomes, and 18 unique  
446 constellations from 29 (20 complete) H5 genomes (Fig 7). The only virus samples with  
447 identical genome constellations were those from the same sampling event and location.  
448 However, even within the same sampling event where the same HA-NA subtype  
449 combination was detected, there was evidence of genetic reassortment. For example, of  
450 the 11 H7N1 virus samples sequenced from a single 2019 sampling event in South  
451 Australia, six viruses had an NS B allele while the others had the NS A allele (Fig 7). We  
452 found that within the same year, partial genome constellations were shared. For example,  
453 in 2018 H7 viruses were collected in New South Wales, Queensland, South Australia, and  
454 Victoria. With the exception of A/wild waterbird/South Australia/18-7728954-  
455 65/2018(H7N6) these viruses share 5 of 8 segment lineages, with differences in PA, NA  
456 and NS. (Fig 7).

457



## H5

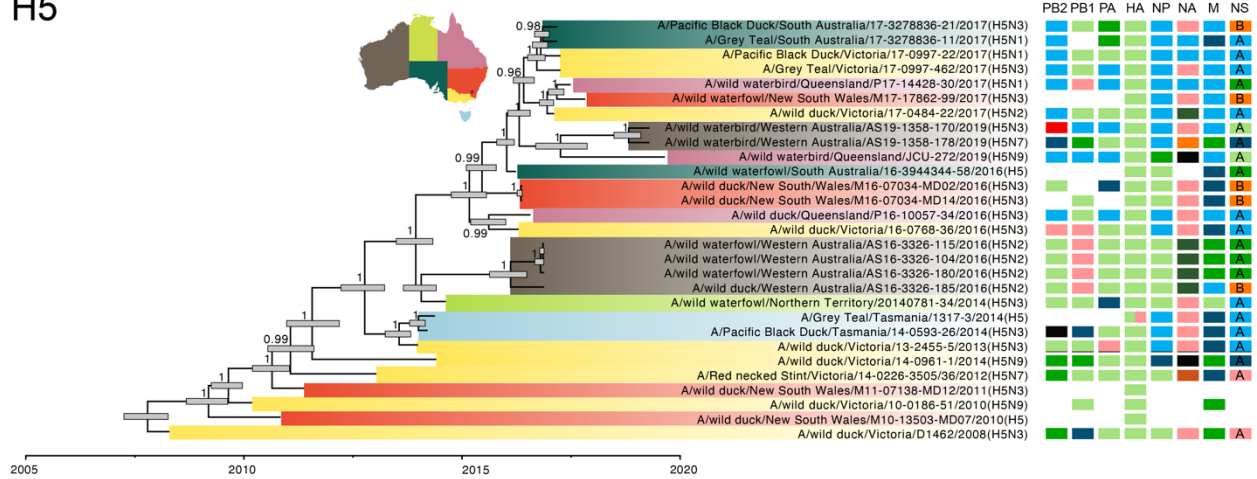

## H7

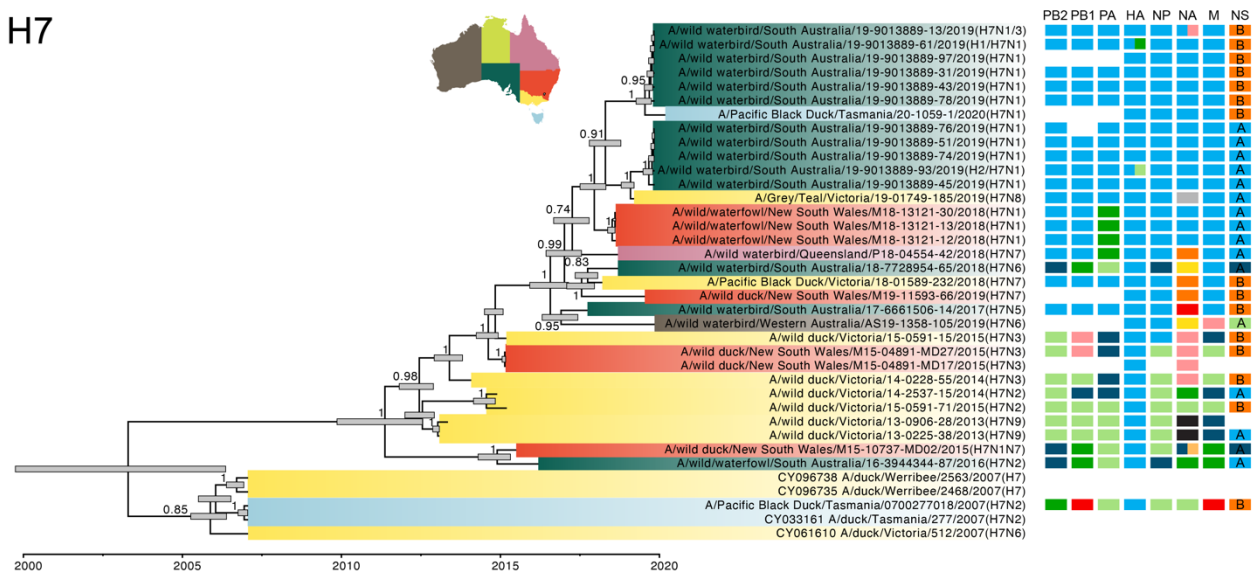

458

459 **Figure 7.** Genome constellations of (A) H5 and (B) H7 viruses. The phylogenies presented are time-  
460 scaled Maximum Clade Credibility Trees. Tips are coloured according to Australian state or territory. Scale  
461 bar denotes the year of sample collection. Node bars are the 95% HPD of node height, and posterior clade  
462 probability is presented on each branch. Adjacent to each tree are coloured tiles where each column of tiles  
463 refers to a segment, arranged according to size: PB2, PB1, PA, HA, NP, M, NS. We only included tiles for  
464 viruses sequenced in this study and in cases where the tiles are blank, no sequence was available for the  
465 segment. Different colours refer to different lineages, whereby tile colour scheme is retained for both H5 and  
466 H7 trees. For example, for the NS segment, viruses with an NS B lineage are coloured in orange. The  
467 viruses here fall into five different lineage clusters of NS A, and these are presented in two different shades  
468 of blue and green and pink. If a virus is a “mixed” infection, segments with two different lineages or subtypes  
469 are split to illustrate this.

470

## 471 Discussion

472 Australia and the Southern Hemisphere have a chequered legacy for research on avian  
473 influenza. The first detection of AIV in wild birds was associated with a mortality event in  
474 terns off the coast of South Africa [48], and the first descriptions of avian influenza from

475 wild, healthy birds was from the Great Barrier Reef islands of Australia [49-51].  
476 Furthermore, one of the most enigmatic subtypes, H15, was initially described in Australia  
477 [52, 53]. Through surveillance activities, particularly since 2006, it has become clear that,  
478 unlike the northern hemisphere, AIV prevalence in Australia is generally low with no strong  
479 seasonal pattern, however prevalence estimates generated from current surveillance  
480 methods have large uncertainty. Despite low isolation success, recent studies have  
481 demonstrated that AIV detections fluctuated temporally and geographically, and that the  
482 full diversity of AIV subtypes circulate on the continent [25, 27, 28, 32, 54]. Early  
483 phylogenetic studies on a limited selection of AIV subtypes and sporadic sequence data  
484 suggested the potential for Australian specific lineages, and detections of intercontinental  
485 reassortants [30, 39, 41-43]. Despite these findings, understanding of AIV evolution in wild  
486 bird populations of the southern hemisphere lags behind that of the northern hemisphere  
487 due to low sampling rates and characterisation of virus data [54, 55]. This study is the first  
488 to comprehensively assess AIV evolution across all detected subtypes in Australia, the  
489 outcomes of which demonstrate the importance of the globally varying characteristics of  
490 bird migration on AIV dynamics.

491  
492 A key observation was that AIV in Australia are characterised by infrequent enduring  
493 introductions followed by decades of isolated circulation. Hence, Australia appears to be a  
494 sink for AIV genetic diversity and not closely linked to the Eurasian virus gene pool. This  
495 dynamic is mirrored in Africa and South America. Although southern hemisphere AIV  
496 lineages sit within lineages originating in the northern hemisphere, our results reinforce  
497 findings from a growing number of studies demonstrating that AIV lineages from the  
498 temperate north are sporadically introduced to the southern hemisphere [41-43, 56-59].  
499 Specifically, sequences generated in the Neotropics fall into lineages within the Nearctic  
500 lineage, and Afrotropical and Australasian lineages are generally part of the Palearctic  
501 lineage. In contrast, export events from the southern hemisphere into the temperate north  
502 have very rarely been reported [57, 60]. Once introduced, lineages circulate in isolation in  
503 the southern hemisphere until extinction. Data from both South America and Australia  
504 illustrate that in some cases, lineages have been maintained in isolation for decades.  
505 Rimondi *et al* 2018 reported that a unique PB2 lineage has been circulating in South  
506 America for ~ 100 years. Similarly, lineages such as those of the Australian H7 subtype  
507 viruses, have been circulating in the country continent for more than 50 years, although  
508 precisely dating the divergence of these lineages is challenging due to the sparsity of AIV  
509 sequence data prior to 1980. Despite long-term isolation, we demonstrated that many

510 lineages that circulated in the 1980's have become extinct and have been replaced,  
511 perhaps due to competitive exclusion as seen in other locations [61].

512

513 Waterfowl migration influences viral evolution, and Australia as a sink for AIV diversity is  
514 likely driven by a lack of waterfowl migration between Australia and Asia, particularly  
515 across the Wallace Line [33]. AIV are predominately distributed by waterfowl, with key  
516 evidence described for the flyway system of North America [62], the rapid movement of  
517 HPAIV H5Nx viruses across the globe coinciding with waterfowl migration patterns [5], and  
518 prevalence peaks in Africa coinciding with the arrival of migratory Palearctic waterfowl [63].  
519 In Oceania, waterfowl species are endemic to the Australo-Papuan region [33]. It is  
520 therefore more likely that the limited introduction of novel AIV lineages to Australia are due  
521 to long-distance migratory shorebirds flying from their northern hemisphere breeding  
522 grounds along the East Asian Australasian Flyway to Australia for the duration of their non-  
523 breeding season [64]. This is notably reflected in the larger number of novel introductions  
524 detected in subtypes such as H9, H10 and H11, and fewer detectable introductions of  
525 subtypes typically associated with waterfowl, especially ducks (e.g. H4). Our finding of  
526 virus gene lineages originating from both Eurasia and North America further supports that  
527 migratory shorebirds play a key role in introducing AIVs into Australia. Alaska is part of the  
528 East Asian Australasian flyway [64] and shorebird species such as Sharp-tailed  
529 Sandpipers (*Calidris acuminata*) [65], Ruddy Turnstone (*Arenaria interpres*) [35] and Bar-  
530 tailed Godwit (*Limosa lapponica*) [66] migrate from Alaska to Oceania. AIV genomes that  
531 we identified to contain novel viral introductions were detected in shorebird samples  
532 including from locations where shorebirds may stop during southward migration, such as  
533 Broome, Western Australia [67]. Like Australia, the Amazon rainforest forms a major  
534 barrier to waterfowl migration in the Nearctic-Neotropical system [68, 69]. As such, in a  
535 similar manner to Australia, the movement of AIVs from the Nearctic to the Neotropics is  
536 mostly likely carried by long-distance shorebird migrants [57, 70, 71]. A large evolutionary  
537 study similarly showed the importance of shorebirds in introducing viruses to South  
538 America, as many of the recently characterized virus detections from shorebirds belonged  
539 to the main North American shorebird-associated lineages rather than divergent South  
540 American lineages [57].

541

542 Within Australia, we found no evidence of directionality in the movement of the AIV gene  
543 pool within Australia. As Australian waterfowl are nomadic rather than strictly migratory,  
544 there are no key migratory flyways within the continent. Rather, ducks have “erratic”

545 movement patterns across the continent which are heavily dictated by the availability of  
546 water [47]. Therefore, consistent patterns of AIV movement between specific locations  
547 would not be expected. However, we did observe high connectivity (*i.e.* the number of  
548 strongly supported viral migration events detected within phylogenies) between the  
549 southeastern locations. Across this region, movements of waterbirds tracking water within  
550 and between the large Murray-Darling and Lake-Eyre basins may form the natural links.  
551 For example, satellite tagged Grey Teals (*Anas gracilis*) moved widely across the Murray-  
552 Darling basin, utilizing permanent and temporary watercourses in Victoria, New South  
553 Wales, and South Australia. Some of these tagged individuals connected the Murray-  
554 Darling with sites in Queensland and Northern Territory with flights of over 1200km [47].  
555 While ducks are likely the major driver of virus movement within Australia, there are also a  
556 number of nomadic waders that similarly move long distances in search of water for  
557 breeding and foraging [72]. Unfortunately, due to low prevalence and a sampling regime  
558 not designed to investigate these dynamics, we were unable to infer the fine scale patterns  
559 of virus movement.

560

561 Our data and analyses are central for placing future Australian AIV genome sequences  
562 and studies within the local and global context. Some recent studies have reported the  
563 possible detection of novel intercontinental reassortants where AIV segments were  
564 reported to be more closely related to lineages from Eurasia and North America compared  
565 to those from Australia [40, 41]. Here we clarified that these viruses are not necessarily  
566 recent intercontinental reassortments but belong to pre-established lineages in Australia  
567 [40, 41]. For appropriate outbreak response and biosecurity policy development it is  
568 crucial to accurately assign the source of AIV detected in poultry or wild birds as potential  
569 novel introductions of “exotic” viruses or their derivative reassortants, especially in the  
570 presence of reassortment promiscuous lineages such as clade 2.3.4.4 HPAIV H5Nx  
571 associated with current epizootics in the Northern Hemisphere that may have devastating  
572 consequences for the local poultry industry. This, combined with the potential roles of  
573 shorebirds in introducing AIV lineages [37] to Australia has implications for wild bird AIV  
574 surveillance and risk assessments for wild bird, poultry and human health.

575

576 In sum, we revealed that the evolution of AIV in Australia differs from patterns found in the  
577 northern hemisphere. These reflect differences in environmental conditions influencing bird  
578 ecology, notably in AIV host competency and movement patterns, and taken together

579 should be integrated into improved risk assessments of potential AIV spillover into poultry  
580 and the distribution of exotic or potentially zoonotic AIV lineages into Australia.

581

## 582 **Methods**

### 583 *Ethics Statement*

584 All capture and sampling of wild birds carried out by Deakin University was conducted  
585 under approval of Deakin University Animal Ethics Committee (permit numbers A113-  
586 2010, B37-2013, B43-2016, B39-2019, B03-2020), Philip Island Nature Park Animal Ethics  
587 Committee (SPFL20082), Wildlife Ethics Committee of South Australia (2011/1,  
588 2012/35,2013/11) and Department of Primary Industries, Parks, Water & Environment  
589 Animal Ethics Committee of the Tasmanian Government (5/2019-20). Banding was done  
590 under Australian Bird Banding Scheme permit (banding authority numbers 2915, 8000,  
591 8001). Research permits were approved by Department of Environment, Land, Water and  
592 Planning Victoria (10005726, 10006663, 10007534, 10008206, 10009534), Department of  
593 Primary Industries, Parks, Water & Environment of the Tasmanian Government (FA11255,  
594 FA13032, FA14110, FA15270, TFA14065, TFA15269, TFA16256, TFA17018, TFA18088,  
595 TFA19044), Office of Environment and Heritage New-South Wales (SL101252),  
596 Department of Environment, Water and Natural Resources South Australia (M25919-  
597 1,2,3,4,5), Department of Environment and Conservation of Western Australia (SF008456,  
598 SF009067, BB003100, BB003163, BB003312), Department of Parks and Wildlife of  
599 Western Australia (08-001825-1) and Parks and Wildlife Commission of the Northern  
600 Territory (51604, 58510)

601

602 Capture and sampling carried out by Agriculture Victoria Research was done in  
603 accordance with permits by the State Government of Victoria Research Permit under  
604 Wildlife Act 1975 (FF380519 Permit No: 10004073, FF383165 Permit No: 10005321,  
605 FF383294 Permit No: 10006640, FF383493 Permit No: 10007877, FF383578 Permit No:  
606 10008927), and Animal Ethics Research Project Permit (AEC 2019-04).

607

608 Sampling undertaken by the Northern Australia Quarantine Strategy was undertaken in  
609 accordance with a Licence to take Fauna (SF006970) from the Department of  
610 Environment and Conservation (WA) and permits from Department of Agriculture, Forestry  
611 and Fisheries (QLD – now Department of Agriculture and Fisheries) (CA 2013/07/703) and  
612 Department of Agriculture and Fisheries (QLD) (CA 2016/07/980). Permits for collection of  
613 faecal samples were not required from Parks and Wildlife (NT) or DAFWA (WA).

614

615 For samples collected by Department of Primary Industries, Parks, Water and  
616 Environment, Tasmania and Primary Industries and Regions, South Australia, Department  
617 of Primary Industries and Regional Development, Western Australia; James Cook  
618 University; NSW Department of Primary Industries; University of Technology Sydney; or  
619 Biosecurity Queensland, Department of Agriculture & Fisheries, permits were not required  
620 for the collection of environmental faecal samples or for samples collected  
621 opportunistically from carcasses.

622

623 Cloacal samples collected from a wild bird as part of a mortality event investigation by  
624 Department of Primary Industries and Regional Development, Western Australia, is also  
625 exempt from a permit.

626

#### 627 *Sample collection and screening*

628 All samples were collected from wild birds or from wild bird faeces since 2006, as part of  
629 the National Avian Influenza Wild Bird Surveillance Program (NAIWB). Details of sample  
630 collection and screening methods can be found in [25]. No HPAIV were detected in wild  
631 birds through the duration of this study.

632

#### 633 *Next generation sequencing*

634 Viral RNA was extracted with MagMAX™-96 viral RNA isolation kit (Thermo Fisher  
635 Scientific, Waltham, MA) from avian faecal swab samples, avian swabs and embryonated  
636 chicken egg isolated virus samples according to manufacturer's instructions. Positive  
637 samples with an influenza A matrix gene qPCR Ct of  $\leq 30$  were selected for influenza A  
638 virus targeted next generation sequencing (NGS). The AIV genome segments were  
639 amplified using the SuperScript™ III one-step RT-PCR system with high fidelity Platinum™  
640 Taq DNA polymerase (Thermo Fisher Scientific) and universal influenza A virus gene  
641 primers as previously described [73]. Sequencing was performed on the Illumina MiSeq  
642 NGS platform (Illumina, San Diego, CA) with up to 24 samples pooled per sequencing run  
643 by use of dual-index library preparation and the Nextera XT DNA Library Preparation kit  
644 and 300-cycle MiSeq Reagent v2 kit (Illumina), according to manufacturer's instructions.  
645 Sequence reads were trimmed for quality and mapped to respective reference sequence  
646 for each influenza A virus gene segment using Geneious Prime software  
647 ([www.geneious.com](http://www.geneious.com)) (Biomatters, Auckland, NZ).

648

649 For a small subset of AIV sequences generated by Agriculture Victoria (Table S1), RNA  
650 was extracted using QIAamp Viral RNA Mini Kit (Qiagen, Hilden, Germany), AIV genome  
651 amplified [74, 75] and Illumina sequencing libraries prepared using PerkinElmer  
652 NEXTFLEX Rapid Directional RNA-Seq Kit 2.0 (Perkin Elmer, Waltham, MA, USA). The  
653 libraries were sequenced using a S4 NovaSeq flow cell with the MiSeq 600-cycle v3 kit.  
654 The sequences were assembled through the iterative refinement meta-assembler (IRMA)  
655 pipeline using the default FLU parameters [76].

656

#### 657 *Data availability*

658 Assembled consensus AIV sequences have been deposited in GenBank (accession  
659 OL369937-OL372235, OL450375- OL450392) (Table S1).

660

#### 661 *Statistical analysis*

662 We analysed sample and sequence metadata for completeness using R 4.0.2 integrated  
663 into RStudio 1.3.1073 and the *dplyr()*, *Hmisc()*, *reshape2()*, and *ggplot2()* packages. To  
664 compare the differences in Ct values of samples and sequencing “completeness” we used  
665 a generalized linear model and a summary of results is presented in Fig S1.

666

#### 667 *Phylogenetic analysis*

668 Full-length reference sequences for all AIV segments and subtypes were downloaded from  
669 the Influenza Research Database (<https://www.fludb.org/>). Our sequence search was  
670 limited to samples from North America, Europe, Asia and Oceania. Overall, for each of the  
671 HA and NA trees, final data sets contained ~500 sequences (+/-20), and for internal  
672 segments data sets contained 800-900 sequences. For the internal segment sequences,  
673 reference sequences did not include the poultry adapted subtypes H5N1, H7N9, H9N2 or  
674 other AIV sequences from poultry. In addition to sequences from Australia generated in  
675 this study, we also included all sequences from Oceania (Australia and New Zealand) in  
676 GenBank, including partial sequences. Australian H10 sequences [30] that were not  
677 available in the Influenza Research Database or GenBank were downloaded from GISAID  
678 (<https://www.gisaid.org/>).

679

680 Sequences were aligned using MUSCLE v3.8.425 [77] integrated within Geneious Prime.  
681 Sequence alignments were cleaned to remove any obviously problematic sequences,  
682 including those containing many ambiguous bases, insertions or deletions, and respective  
683 data sets were trimmed. Global phylogenetic trees were estimated using the maximum

684 likelihood (ML) method incorporating the most appropriate model of nucleotide substitution  
685 estimated using Smart Model Selection in PhyML v3.0 [78, 79]. Trees were visualised  
686 using FigTree v1.4.4 (<http://tree.bio.ed.ac.uk/software/figtree/>). From these global trees we  
687 were able to infer the number of independent introductions into Australia, as well as the  
688 number of local genome constellations, and used this information to assess the pattern  
689 and frequency of segment reassortment.

690

#### 691 *Time-scaled phylogenetic analysis*

692 Time-structured phylogenetic trees of all contemporary (those lineages circulating in 2005  
693 or later) Australian lineages of HA, NA and nucleoprotein (NP) sequences, were estimated  
694 using the Bayesian Markov chain Monte Carlo method available in BEAST 1.10.4 [80].  
695 Prior to the BEAST analysis ML trees were used to determine the degree of clock-like  
696 behaviour of each data set by performing linear regressions of root-to-tip distances against  
697 year of sampling using TempEst [81]. All data sets exhibited a strong positive correlation  
698 between genetic divergence and sampling time, with correlation coefficients ranging from  
699 0.8-0.99 and  $R^2$  values ranging from 0.66-0.99. Using BEAST, time-stamped data were  
700 analysed under the uncorrelated lognormal relaxed molecular clock [82] and the SRD06  
701 codon-structured nucleotide substitution model [83]. We selected the uncorrelated  
702 lognormal relaxed clock following comparisons of the marginal likelihood of the strict and  
703 uncorrelated lognormal relaxed molecular clocks for a subset of trees (H4, H5, N6, N8,  
704 and two NP lineages) using path/stepping-stone sampling [84]. The Bayesian skyline  
705 coalescent tree prior was used as this likely reflects the complex epidemiological dynamics  
706 of AIV [85]. Three independent analyses of 100 million generations were performed, which  
707 were then combined in LogCombiner v1.8 following the removal of a 10% burn-in.  
708 Convergence was assessed using Tracer v1.6 (<http://tree.bio.ed.ac.uk/software/tracer/>).  
709 Maximum credibility lineage trees were generated using TreeAnnotator v1.8 and visualized  
710 in FigTree v1.4.

711

#### 712 *AIV phylogeography*

713 We selected the HA, NA and NP internal segments as representatives to investigate the  
714 phylogeography of AIVs in Australia. Importantly, the selected HA or NA subtypes  
715 comprised Australia-specific lineages with >20 sequences (containing sequences from no  
716 other continent). For the NP segment, we selected two lineages that comprised only  
717 sequences from Australia. Discrete trait analysis was performed using the asymmetric  
718 substitution model, and social networks were inferred with Bayesian Stochastic Search



719 Variable Selection (BSSVS) [86]. The extent and pattern of virus movement between  
720 locations were determined using Bayes Factor analysis generated by Spread3 [87]. We  
721 considered Bayes Factors of greater than 10 to be strong support of virus movement  
722 between the locations sampled, and greater than 100 to be decisive support [88, 89] within  
723 the necessary constraints imposed by sampling bias. The mean number of migration  
724 events were inferred by logging/counting the transitions between states along the  
725 phylogenetic branches (Markov Jumps) [90]. We also calculated the time spent in the  
726 states between two transitions (Markov Rewards) to ensure that rewards were not strongly  
727 correlated with export events, thus providing some insight into the effect of sampling bias  
728 in our dataset.

729

## 730 **Acknowledgements**

731 The authors would like the contribution of the following individuals: William Steele, Richard  
732 Akers, Suelin Haynes and Nick Crosbie from Melbourne Water; Zachary Powell, Heath  
733 Dunstan, Lee Manning, John Turnbull, Octavian Manescu, and Mark Jones from Game  
734 Management Authority; Jana Batovska, Peter Mee, Xinlong Wang and Macy Hamilton-  
735 Smith from Agriculture Victoria Research; Clive Minton, Rosalind Jessop, Robyn Atkinson  
736 and Rob Patrick from the Victorian Wader Study Group; Emma Watkins, Marianne  
737 Douglas, Teresa Wilson and Kate Swift from Department of Primary Industries, Parks,  
738 Water and Environment, Tasmania; Sam Hair, Jamie Ong, Andrew Hughes, Mark O'Dea,  
739 Vanessa Rushworth, Emily Glass & Kristine Rayner from Department of Primary Industries  
740 and Regional Development, Western Australia; the team from The Northern Australia  
741 Quarantine Strategy; K Edla Arzey from NSW Department of Primary Industries; Mick,  
742 Todd, Fred van Gessel, Greg Little and Tyler Williams for NSW sampling; Sandy Adsett,  
743 Ibrahim Diallo and Allison Crook from Biosecurity Queensland; Kim Critchley from Primary  
744 Industries and Regions, South Australia; Chris Bunn and Lyndel Post from the Australian  
745 Government Department of Agriculture; Leesa Haynes, Rupert Woods from Wildlife Health  
746 Australia (previously Australian Wildlife Health Network); Jemma Bergfeld, Mark Ford,  
747 Gemma Harvey, Tristan Reid, Songhua Shan, Som Walker, Jianning Wang, James  
748 Watson, David Williams and other diagnostic staff from the CSIRO Australian Centre for  
749 Disease Preparedness; Ankita George and Malet Aban from the WHO Collaborating  
750 Centre for Reference and Research on Influenza, and staff from the Bolivar Waste Water  
751 Treatment Plant. We thank Sebastian Duchene for advice on executing the Markov Jump  
752 analysis. In addition to those identified above, the authors would like to thank all  
753 individuals, organisations and laboratories that contribute to the NAIWB Surveillance

754 Program via providing expert input, logistic support and/or collection, analysis and  
755 submission of wild bird influenza virus samples and data, including Birdlife Australia, state  
756 and territory bird banding groups, wildlife/shorebird groups and hunter groups.  
757 We gratefully acknowledge the authors from the originating laboratories and submitting  
758 laboratories where genetic sequence data (EPI397842-64) were generated and shared via  
759 the GISAID Initiative.  
760  
761

## 762 References

- 763 1. Bennett CE, Thomas R, Williams M, Zalasiewicz J, Edgeworth M, Miller H, et al.  
764 The broiler chicken as a signal of a human reconfigured biosphere. *R Soc Open Sci*.  
765 2018;5:doi: <https://doi.org/10.1098/rsos.180325>.
- 766 2. Bar-On YM, Phillips R, Milo R. The biomass distribution on Earth. *Proc Natl Acad*  
767 *Sci USA*. 2018;115(25):6506-11. doi:10.1073/pnas.1711842115
- 768 3. Lycett SJ, Duchatel F, Digard P. A brief history of bird flu. *Philos Trans R Soc Lond,*  
769 *B, Biol Sci*. 2019;374(1775):20180257. doi: 10.1098/rstb.2018.0257.
- 770 4. Gilbert M, Xiao XM, Robinson TP. Intensifying poultry production systems and the  
771 emergence of avian influenza in China: a 'One Health/Ecohealth' epitome. *Arch Public*  
772 *Health*. 2017;75:48. doi: 10.1186/s13690-017-0218-4. doi: 10.1186/s13690-017-0218-4.
- 773 5. Global Consortium for H5N8 and Related Influenza Viruses. Role for migratory wild  
774 birds in the global spread of avian influenza H5N8. *Science*. 2016;354(6309):213-7. doi:  
775 10.1126/science.aaf8852.
- 776 6. Olsen B, Munster VJ, Wallensten A, Waldenström J, Osterhaus ADME, Fouchier  
777 RAM. Global patterns of influenza A virus in wild birds. *Science*. 2006;312:384-8.
- 778 7. Cumming GS, Abolnik C, Caron A, Gaidet N, Grewar J, Hellard E, et al. A social–  
779 ecological approach to landscape epidemiology: geographic variation and avian influenza.  
780 *Landsc Ecol*. 2015;30(6):963-85. doi: 10.1007/s10980-015-0182-8.
- 781 8. Latorre-Margalef N, Tolf C, Grosbois V, Avril A, Bengtsson D, Wille M, et al. Long-  
782 term variation in influenza A virus prevalence and subtype diversity in a migratory Mallards  
783 in Northern Europe. *Proc Royal Soc B*. 2014;281:doi: 10.1098/rspb.2014.0098 doi:  
784 10.1098/rspb.2014.0098
- 785 9. van Dijk JGB, Hoyer BJ, Verhagen JH, Nolet BA, Fouchier RAM, Klaassen M.  
786 Juveniles and migrants as drivers for seasonal epizootics of avian influenza virus. *J Anim*  
787 *Ecol*. 2014;83(1):266-75. doi: 10.1111/1365-2656.12131.
- 788 10. Wilcox BR, Knutsen GA, Berdeen J, Goekjian VH, Poulson R, Goyal S, et al.  
789 Influenza A viruses in ducks in Northwestern Minnesota: fine scale spatial and temporal  
790 variation in prevalence and subtype diversity. *PLoS ONE*. 2011;6:e24010. doi:  
791 10.1371/journal.pone.0024010.
- 792 11. Ramey AM, Reeves AB. Ecology of influenza A viruses in wild birds and wetlands  
793 of Alaska. *Avian Dis*. 2020;64(2):109-22. doi: 10.1637/0005-2086-64.2.109.
- 794 12. Chen R, Holmes EC. Avian influenza virus exhibits rapid evolutionary dynamics.  
795 *Mol Biol Evol*. 2006;23:2336-41.
- 796 13. Dugan VG, Chen R, Spiro DJ, Sengamalay N, Zaborsky J, Ghedin E, et al. The  
797 evolutionary genetics and emergence of avian influenza A viruses in wild birds. *PLoS*  
798 *Pathog*. 2008;4:e1000076. doi: 10.1371/journal.ppat/.
- 799 14. Wille M, Tolf C, Avril A, Latorre-Margalef N, Wallerstrom S, Olsen B, et al.  
800 Frequency and patterns of reassortment in natural influenza A virus infection in a reservoir  
801 host. *Virology*. 2013;443(1):150-60. doi: 10.1016/j.virol.2013.05.004.
- 802 15. Lam TT-Y, Ip HS, Ghedin E, Wentworth DE, Halpin RA, Stockwell TB, et al.  
803 Migratory flyway and geographical distance are barriers to the gene flow of influenza  
804 viruses among North American birds. *Ecology Letters*. 2011;15:24-33.
- 805 16. McCauley JW, Hongo S, Kaverin NV, Kochs G, Lamb RA, Matrosovich MN, et al.  
806 *Orthomyxoviridae*. International Committee on the Taxonomy of Viruses 9th Report: 2019  
807 Release. Berlin, Germany 2019. p. [https://talk.ictvonline.org/ictv-](https://talk.ictvonline.org/ictv-reports/ictv_9th_report/negative-sense-rna-viruses-2011/w/negrna_viruses/209/orthomyxoviridae)  
808 [reports/ictv\\_9th\\_report/negative-sense-rna-viruses-](https://talk.ictvonline.org/ictv-reports/ictv_9th_report/negative-sense-rna-viruses-2011/w/negrna_viruses/209/orthomyxoviridae)  
809 [2011/w/negrna\\_viruses/209/orthomyxoviridae](https://talk.ictvonline.org/ictv-reports/ictv_9th_report/negative-sense-rna-viruses-2011/w/negrna_viruses/209/orthomyxoviridae).
- 810 17. Webster RG, Bean WJ, Gorman OT, Chambers TM, Kawaoka Y. Evolution and  
811 ecology of influenza A viruses. *Microbiol Rev*. 1992;56(1):152-79.

- 812 18. van Dijk JGB, Verhagen JH, Wille M, Waldenström J. Host and virus ecology as  
813 determinants of influenza A virus transmission in wild birds. *Curr Opin Virol.* 2018;28:26-  
814 36.
- 815 19. Swayne DE, Suarez DL. Highly pathogenic avian influenza. *Rev Sci Tech.*  
816 2000;19:463-82.
- 817 20. Monne I, Fusaro A, Nelson MI, Bonfanti L, Mulatti P, Hughes J, et al. Emergence of  
818 a highly pathogenic avian influenza virus from a low-pathogenic progenitor. *J Virol.*  
819 2014;88(8):4375-88. doi: 10.1128/JVI.03181-13.
- 820 21. Bessiere P, Figueueroa T, Coggon A, Foret-Lucas C, Houffschmidt A, Fusade-Boyer  
821 M, et al. The strength of the innate immune response drives the within-host competition  
822 between highly and low pathogenic avian influenza viruses. *bioRxiv.* 2021:doi:  
823 <https://doi.org/10.1101/2021.04.06.438580>.
- 824 22. Lisovski S, van Dijk JGB, Klinkenberg D, Nolet BA, Fouchier RAM, Klaassen M.  
825 The roles of migratory and resident birds in local avian influenza infection dynamics. *J Appl*  
826 *Ecol.* 2018;55(6):2963-75. doi: 10.1111/1365-2664.13154.
- 827 23. Lisovski S, Hoyer BJ, Klaassen M. Geographic variation in seasonality and its  
828 influence on the dynamics of an infectious disease. *Oikos.* 2017;126(7):931-6. doi:  
829 10.1111/oik.03796.
- 830 24. Roshier D, Robertson AI, Kingsford RT. Responses of waterbirds to flooding in an  
831 arid region of Australia and implications for conservation. *Biol Conserv.* 2002;106:399-441.
- 832 25. Grillo VL, Arzey KE, Hansbro PM, Hurt AC, Warner S, Bergfeld J, et al. Avian  
833 influenza in Australia: a summary of 5 years of wild bird surveillance. *Aust Vet J.*  
834 2015;93(11):387-93. doi: 10.1111/avj.12379.
- 835 26. Curran JM, Ellis TM, Robertson ID. Serological surveillance of wild waterfowl in  
836 northern Australia for avian influenza virus shows variations in prevalence and a cyclical  
837 periodicity of infection. *Avian Dis.* 2015;59(4):492-7. doi: 10.1637/11113-043015-Reg.
- 838 27. Hansbro PM, Warner S, Tracey JP, Arzey KE, Selleck P, O'Riley K, et al.  
839 Surveillance and analysis of avian influenza viruses, Australia. *Emerg Infect Dis.*  
840 2010;16(12):1896-904. doi: 10.3201/eid1612.100776.
- 841 28. Haynes L, Arzey E, Bell C, Buchanan N, Burgess G, Cronan V, et al. Australian  
842 surveillance for avian influenza viruses in wild birds between July 2005 and June 2007.  
843 *Aust Vet J.* 2009;87(7):266-72. doi: 10.1111/j.1751-0813.2009.00446.x.
- 844 29. Ferenczi M, Beckmann C, Warner S, Loyn R, O'Riley K, Wang X, et al. Avian  
845 influenza infection dynamics under variable climatic conditions, viral prevalence is rainfall  
846 driven in waterfowl from temperate, south-east Australia. *Vet Res.* 2016;47:23. doi:  
847 10.1186/s13567-016-0308-2.
- 848 30. Vijaykrishna D, Deng YM, Su YCF, Fourment M, Iannello P, Arzey GG, et al. The  
849 recent establishment of North American H10 lineage influenza viruses in Australian wild  
850 waterfowl and the evolution of Australian avian influenza viruses. *J Virol.* 2013;87:10182-9.
- 851 31. Hoque MA, Burgess GW, Cheam AL, Skerratt LF. Epidemiology of avian influenza  
852 in wild aquatic birds in a biosecurity hotspot, North Queensland, Australia. *Prev Vet Med.*  
853 2015;118(1):169-81. doi: 10.1016/j.prevetmed.2014.11.009.
- 854 32. Tracey JP. Risk-based surveillance of avian influenza in Australia's wild birds.  
855 *Wildlife Research.* 2010;37:134-44.
- 856 33. McCallum HI, Roshier DA, Tracey JP, Joseph L, Heinsohn R. Will Wallace's Line  
857 save Australia from avian influenza? *Ecology and Society.* 2008;13:41. doi:  
858 <http://www.ecologyandsociety.org/vol13/iss2/art41/>.
- 859 34. Tracey JP, Woods R, Roschier D, West P, Saunders GR. The role of wild birds in  
860 the transmission of avian influenza for Australia: an ecological perspective. *Emu.*  
861 2004;104:109-24.
- 862 35. Minton C, Gosbell K, Johns P, Christie M, Klaassen M, Hassell C, et al. Geolocator  
863 studies on Ruddy Turnstones *Arenaria interpres* and Greater Sandplovers *Charadrius*

- 864 *Ieschenaultii* in the East Asian–Australasia Flyway reveal widely different migration  
865 strategies. Wader Study Group Bulletin. 2011;118:87-96.
- 866 36. Minton C, Wahl J, Jessop R, Hassell C, Collins P, Gibbs H. Migration routes of  
867 waders which spend the non-breeding season in Australia. Stilt. 2006;50:135-57.
- 868 37. Wille M, Lisovski S, Risely A, Ferenczi M, Roshier D, Wong FYK, et al. Serologic  
869 evidence of exposure to highly pathogenic avian influenza H5 viruses in migratory  
870 shorebirds, Australia. Emerg Infect Dis. 2019;25(10):1903-10. doi:  
871 10.3201/eid2510.190699.
- 872 38. Hanson BA, Luttrell MP, Goekjian VH, Niles L, Swayne DE, Senne D, et al. Is the  
873 occurrence of avian influenza virus in *Charadriiformes* species and location dependant?  
874 J Wildlife Dis. 2008;44(2):351-61.
- 875 39. Bulach D, Halpin R, Spiro D, Pomeroy L, Janies D, Boyle DB. Molecular analysis of  
876 H7 avian influenza viruses from Australia and New Zealand: genetic diversity and  
877 relationships from 1976 to 2007. J Virol. 2010;84(19):9957-66. doi: 10.1128/JVI.00930-10.
- 878 40. Bhatta TR, Chamings A, Vibin J, Klaassen M, Alexandersen S. Detection of a  
879 reassortant H9N2 avian influenza virus with intercontinental gene segments in a resident  
880 Australian Chestnut Teal. Viruses. 2020;12(1). doi: 10.3390/v12010088.
- 881 41. Hoye B, Donato CM, Lisovski S, Deng Y-M, Warner S, Hurt AC, et al. Reassortment  
882 and persistence of influenza A viruses from diverse geographic origins within Australian  
883 wild birds: evidence from a small, isolated population of Ruddy turnstones. J Virol.  
884 2021;doi:10.1128/JVI.02193-20.
- 885 42. Kishida N, Sakoda Y, Shiromoto M, Bai GR, Isoda N, Takada A, et al. H2N5  
886 influenza virus isolates from terns in Australia: genetic reassortants between those of the  
887 Eurasian and American lineages. Virus Genes. 2008;37(1):16-21. doi: 10.1007/s11262-  
888 008-0235-z.
- 889 43. Hurt AC, Hansbro PM, Selleck P, Olsen B, Minton C, Hampson AW, et al. Isolation  
890 of avian influenza viruses from two different transhemispheric migratory shorebird species  
891 in Australia. Arch Virol. 2006;151(11):2301-9. doi: 10.1007/s00705-006-0784-1.
- 892 44. Wille M, Latorre-Margalef N, Tolf C, Halpin R, Wentworth DE, Olsen B, et al. Where  
893 do all the subtypes go? Temporal dynamics of H8–H12 influenza A viruses in waterfowl.  
894 Virus Evol. 2018;4(2):doi: 10.1093/ve/vey025.
- 895 45. Scott A, Hernandez-Jover M, Groves P, Toribio JA. An overview of avian influenza  
896 in the context of the Australian commercial poultry industry. One Health. 2020;10. doi:  
897 10.1016/j.onehlt.2020.100139.
- 898 46. Melville DS, Battley PF. Shorebirds in New Zealand. Stilt. 2006;50:295-303.
- 899 47. Roshier D, Asmus M, Klaassen M. What drives long-distance movements in the  
900 nomadic Grey Teal *Anas gracilis* in Australia? Ibis. 2008;150(3):474-84.
- 901 48. Becker WB. Isolation and classification of tern virus: influenza virus A/Tern/South  
902 Africa/1961. Journal of Hygiene. 1966;64:309-20.
- 903 49. Downie JC, Hinshaw VS, Laver WG. Ecology of influenza - isolation of type A  
904 influenza viruses from Australian pelagic birds. Aust J Exp Biol Med Sci. 1977;55:635-43.
- 905 50. Downie JC, Laver WG. Isolation of a type A influenza virus from an Australian  
906 pelagic bird. Virology. 1973;51:259-69.
- 907 51. Laver WG, Webster RG. Antibodies to human influenza virus neuraminidase (the A-  
908 Asian-57 H2N2 strain) in sera from Australian pelagic birds. Bull World Health Organ.  
909 1972;47:535-41.
- 910 52. Mackenzie JS, Edwards EC, Holmes RM, Hinshaw VS. Isolation of ortho- viruses  
911 and paramyxoviruses from wild birds in Western Australia and the characterization of  
912 novel influenza A viruses. Aust J Exp Biol Med Sci. 1984;62:89-99.
- 913 53. Rohm C, Zhou N, Suss J, Mackenzie J, Webster RG. Characterization of a novel  
914 influenza hemagglutinin, H15: criteria for determination of influenza A subtypes. Virology.  
915 1996;217(2):508-16. doi: 10.1006/viro.1996.0145.

- 916 54. Klaassen M, Hoyer BJ, Roshier DA. Identifying crucial gaps in our knowledge of the  
917 life-history of avian influenza viruses – an Australian perspective. *Emu*. 2011;111:103-12.
- 918 55. Runstadler J, Hill N, Hussein IT, Puryear W, Keogh M. Connecting the study of wild  
919 influenza with the potential for pandemic disease. *Infect Genet Evol*. 2013;17:162-87. doi:  
920 10.1016/j.meegid.2013.02.020.
- 921 56. Fusaro A, Zecchin B, Vrancken B, Abolnik C, Ademun R, Alassane A, et al.  
922 Disentangling the role of Africa in the global spread of H5 highly pathogenic avian  
923 influenza. *Nat Commun*. 2019;10(1):5310. doi: 10.1038/s41467-019-13287-y.
- 924 57. Rimondi A, Gonzalez-Reiche AS, Olivera VS, Decarre J, Castresana GJ, Romano  
925 M, et al. Evidence of a fixed internal gene constellation in influenza A viruses isolated from  
926 wild birds in Argentina (2006-2016). *Emerg Microbes Infect*. 2018;7(1):194. doi:  
927 10.1038/s41426-018-0190-2.
- 928 58. Nelson MI, Pollett S, Gherzi B, Silva M, Simons MP, Icochea E, et al. The genetic  
929 diversity of influenza A viruses in wild birds in Peru. *PLoS ONE*. 2016;11(1):e0146059. doi:  
930 10.1371/journal.pone.0146059.
- 931 59. Abolnik C, Gerdes GH, Sinclair M, Ganzevoort BW, Kitching JP, Burger CE, et al.  
932 Phylogenetic analysis of influenza A viruses (H6N8, H1N8, H4N2, H9N2, H10N7) isolated  
933 from wild birds, ducks, and ostriches in South Africa from 2007 to 2009. *Avian Dis*.  
934 2010;54(1 Suppl):313-22. doi: 10.1637/8781-040109-Reg.1.
- 935 60. Bui VN, Ogawa H, Xininigen, Karibe K, Matsuo K, Awad SS, et al. H4N8 subtype  
936 avian influenza virus isolated from shorebirds contains a unique PB1 gene and causes  
937 severe respiratory disease in mice. *Virology*. 2012;423(1):77-88. doi:  
938 10.1016/j.virol.2011.11.019.
- 939 61. Bahl J, Vijaykrishna D, Holmes EC, Smith GJD, Guan Y. Gene flow and competitive  
940 exclusion of avian influenza A virus in natural reservoir hosts. *Virology*. 2009;390:289-97.
- 941 62. Fourment M, Darling AE, Holmes EC. The impact of migratory flyways on the  
942 spread of avian influenza virus in North America. *BMC Evol Biol*. 2017;17(1):118. doi:  
943 10.1186/s12862-017-0965-4.
- 944 63. Gaidet N, Caron A, Cappelle J, Cumming GS, Balanca G, Hammoumi S, et al.  
945 Understanding the ecological drivers of avian influenza virus infection in wildfowl: a  
946 continental-scale study across Africa. *Proc Royal Soc B*. 2012;279:1131-41.
- 947 64. Boere GC, Stroud DA. The flyway concept: what it is and what it isn't. In: Boere GC,  
948 Galbraith CA, Stroud DA, editors. *Waterbirds around the world*. Edinburgh, UK: The  
949 Stationery Office; 2006. p. 40-7.
- 950 65. Handel CM, Gill RE. Wayward youth: trans-Beringian movement and differential  
951 southward migration by juvenile Sharp-tailed Sandpipers. *Arctic*. 2010;63(3):273-88.
- 952 66. Gill RE, Piersma T, Hufford G, Servranckx R, Riegen A. Crossing the ultimate  
953 ecological barrier: Evidence for an 11000-km-long nonstop flight from Alaska to New  
954 Zealand and eastern Australia by Bar-tailed Godwits. *Condor*. 2005;107(1):1-20. doi: Doi  
955 10.1650/7613.
- 956 67. Lisovski S, Gosbell K, Hassell C, Minton C. Tracking the full annual-cycle of the  
957 Great Knot *Calidris tenuirostris*, a long-distance migratory shorebird of the East Asian-  
958 Australasian Flyway. *Wader Study*. 2013;123:doi: 10.18194/ws.00048.
- 959 68. Botero JE, Rusch DH, editors. Recoveries of North American Waterfowl in the  
960 Neotropics. *Waterfowl in Winter: Selected Papers from Symposium and Workshop Held in*  
961 *, Texas, 7-10 January 1985; 1988; Galveston, Texas, U. S. A. : University of Minnesota*  
962 *Press*.
- 963 69. Baldassarre GA. *Ducks, Geese, and Swans of North America*: JHU Press; 2014.
- 964 70. De Araujo J, De Azevedo-Junior SM, Gaidet N, Hurtado RF, Walker D, Thomazelli  
965 LM, et al. Avian influenza virus (H11N9) in migratory shorebirds wintering in the Amazon  
966 Region, Brazil. *PLoS ONE*. 2014;9:e110141. doi:10.1371/journal.pone.0110141.

- 967 71. Araujo J, Petry MV, Fabrizio T, Walker D, Ometto T, Thomazelli LM, et al. Migratory  
968 birds in southern Brazil are a source of multiple avian influenza virus subtypes. *Influenza*  
969 *Other Respir Viruses*. 2018;12(2):220-31. doi: 10.1111/irv.12519.
- 970 72. Pedler RD, Ribot RF, Bennett AT. Extreme nomadism in desert waterbirds: flights of  
971 the banded stilt. *Biol Lett*. 2014;10(10):20140547. doi: 10.1098/rsbl.2014.0547.
- 972 73. Zhou B, Donnelly ME, Scholes DT, George KS, Hatta M, Kawaoka Y, et al. Single-  
973 reaction genomic amplification accelerates sequencing and vaccine production for  
974 classical and swine origin human influenza A viruses. *J Virol*. 2009;83(19):10309-13. doi:  
975 10.1128/Jvi.01109-09.
- 976 74. Heine HG, Foord AJ, Wang J, Valdeter S, Walker S, Morrissy C, et al. Detection of  
977 highly pathogenic zoonotic influenza virus H5N6 by reverse-transcriptase quantitative  
978 polymerase chain reaction. *Virol J*. 2015;12:18. doi: 10.1186/s12985-015-0250-3.
- 979 75. Kampmann ML, Fordyce SL, Avila-Arcos MC, Rasmussen M, Willerslev E, Nielsen  
980 LP, et al. A simple method for the parallel deep sequencing of full influenza A genomes. *J*  
981 *Virol Methods*. 2011;178(1-2):243-8. doi: 10.1016/j.jviromet.2011.09.001.
- 982 76. Shepard SS, Meno S, Bahl J, Wilson MM, Barnes J, Neuhaus E. Viral deep  
983 sequencing needs an adaptive approach: IRMA, the iterative refinement meta-assembler.  
984 *BMC Genomics*. 2016;17:708. doi: 10.1186/s12864-016-3030-6.
- 985 77. Edgar RC. MUSCLE: a multiple sequence alignment method with reduced time and  
986 space complexity. *BMC Bioinformatics*. 2004;5:113-32.
- 987 78. Guindon S, Dufayard JF, Lefort V, Anisimova M, Hordijk W, Gascuel O. New  
988 algorithms and methods to estimate maximum-likelihood phylogenies: assessing the  
989 performance of PhyML 3.0. *Syst Biol*. 2010;59(3):307-21. doi: 10.1093/sysbio/syq010.
- 990 79. Lefort V, Longueville JE, Gascuel O. SMS: Smart Model Selection in PhyML. *Mol*  
991 *Biol Evol*. 2017;34(9):2422-4. doi: 10.1093/molbev/msx149.
- 992 80. Drummond AJ, Suchard MA, Xie D, Rambaut A. Bayesian phylogenetics with  
993 BEAUti and the BEAST 1.7. *Mol Biol Evol*. 2012;29(8):1969-73. doi:  
994 10.1093/molbev/mss075.
- 995 81. Rambaut A, Lam TT, Carvalho LM, Pybus OG. Exploring the temporal structure of  
996 heterochronous sequences using TempEst (formerly Path-O-Gen). *Virus Evol*. 2016;2:doi:  
997 10.1093/ve/vew007.
- 998 82. Li WL, Drummond AJ. Model averaging and Bayes factor calculation of relaxed  
999 molecular clocks in Bayesian phylogenetics. *Mol Biol Evol*. 2012;29(2):751-61. doi:  
1000 10.1093/molbev/msr232.
- 1001 83. Shapiro B, Rambaut A, Drummond AJ. Choosing appropriate substitution models  
1002 for the phylogenetic analysis of protein-coding sequences. *Mol Biol Evol*. 2006;23(1):7-9.  
1003 doi: 10.1093/molbev/msj021.
- 1004 84. Baele G, Lemey P, Vansteelandt S. Make the most of your samples: Bayes factor  
1005 estimators for high-dimensional models of sequence evolution. *BMC Bioinformatics*.  
1006 2013;14:85. doi: 10.1186/1471-2105-14-85.
- 1007 85. Drummond AJ, Rambaut A, Shapiro B, Pybus OG. Bayesian coalescent inference  
1008 of past population dynamics from molecular sequences. *Mol Biol Evol*. 2005;22(5):1185-  
1009 92. doi: 10.1093/molbev/msi103.
- 1010 86. Lemey P, Rambaut A, Drummond AJ, Suchard MA. Bayesian phylogeography finds  
1011 its roots. *PLoS Comput Biol*. 2009;5(9):e1000520. doi: 10.1371/journal.pcbi. doi:  
1012 10.1371/journal.pcbi.1000520.
- 1013 87. Bielejec F, Baele G, Vrancken B, Suchard MA, Rambaut A, Lemey P. SpreaD3:  
1014 Interactive visualization of spatiotemporal history and trait evolutionary processes. *Mol Biol*  
1015 *Evol*. 2016;33(8):2167-9. doi: 10.1093/molbev/msw082.
- 1016 88. Hill NJ, Smith LM, Muzaffar SB, Nagel JL, Prosser DJ, Sullivan JD, et al. Co-  
1017 habiting in a disease hotspot: Overlap between wild and domestic birds in Egypt impacts

1018 transmission of highly pathogenic H5N1. *Virus Evol.* 2021;veaa093:doi:  
1019 <https://doi.org/10.1093/ve/veaa093>.  
1020 89. Jeffreys H. *The theory of probability*. Oxford, U. K.: Oxford University Press; 1961.  
1021 90. Minin VN, Suchard MA. Counting labeled transitions in continuous-time Markov  
1022 models of evolution. *J Math Biol.* 2008;56(3):391-412. doi: 10.1007/s00285-007-0120-8.  
1023  
1024



1025 **Figure Captions**

1026

1027 **Figure 1. Spatial and temporal distribution of avian influenza genomes used in this**  
1028 **study.** (A) Map of Australia illustrating regional sampling locations. Where sampling  
1029 locations were within 500km, they were merged into a single location. The value within the  
1030 circle corresponds to the number of unique viral genomes comprising at least one segment  
1031 from each location. States and Territories are as follows: VIC Victoria, NSW New South  
1032 Wales, QLD Queensland, NT Northern Territory, WA Western Australia, SA South  
1033 Australia and TAS Tasmania. (B) Number of genomes per state per year. Colours from  
1034 panel B correspond to the fill colour of the state in panel A. This figure includes genomes  
1035 comprising one or more segments and contains no duplicates. This figure includes all  
1036 sequences generated as part of the National Avian Influenza Wild Bird Surveillance  
1037 Program, including those recently published in [40, 41]. Metadata is available in Table S1  
1038 and a detailed plot illustrating exact virus sample collection dates and locations can be  
1039 found in Fig S2.

1040

1041 **Figure 2. HA-NA subtype linkage in data generated for this study.** (A) The number of  
1042 each HA-NA subtype combinations (values) and the proportion of the total data set these  
1043 values represent (shading). (B) A plot of the Pearson residuals of Chi-squared tests. For a  
1044 given cell, the size of the circle is proportional to the amount of the cell contribution.  
1045 Positive residuals are in blue and identify HA and NA subtypes for which there is a strong  
1046 positive association in the data set. Negative residuals are in light pink and show a weak  
1047 negative association, that is, they are underrepresented in the data set. This figure  
1048 comprises unique viral genomes with at least one segment.

1049

1050 **Figure 3. Phylogenetic trees of subtypes H4 and H11.** (A, C) Phylogenetic trees  
1051 comprising global diversity. Branches of reference sequences are coloured by continent.  
1052 Sequences from Australia are coloured in pink (2005 and later) and in purple (pre-2005),  
1053 with 2005 marking the year of the oldest sequence in the data set generated in this study.  
1054 (B, D) Time structured phylogenetic trees. The trees comprise Australian lineages (as  
1055 indicated by grey boxes in A, C) and closest relatives (retrieved by BLAST searches).  
1056 Branches are coloured by year and geography as above. Branch labels correspond to  
1057 posterior clade probabilities of each node, node bars correspond to the 95% HPD of node  
1058 height. We selected H4 as it is the only HA subtype for which there is clear introduction of

1059 an Australian lineage virus into Asia (indicated in square parenthesis), and is an example  
1060 of an HA segment for which there is only a single contemporary lineage. We selected H11  
1061 as it is the subtype with the largest number of contemporary Australian lineages (4), of  
1062 which 2 are represented by a single sequence. Trees for all other HA subtypes can be  
1063 found in Fig S3-S14

1064

1065 **Figure 4. The time-scale of AIV evolution by subtype in Australia.** (A) A schematic  
1066 phylogeny demonstrating the differences between the tMRCA of Australian lineages and  
1067 the dates of divergence from reference sequences. (B) The tMRCA distribution of  
1068 contemporary Australian lineages of the HA segments and (C) dates of divergence from  
1069 the reference sequences of all HA lineages. Points represent the node date and bars the  
1070 95% HPD. For segments with multiple lineages, multiple estimates have been provided.  
1071 Where a novel introduction is represented by a single sequence the tMRCA was not  
1072 estimated (here, represented by “\*singleton) but the date of divergence from reference  
1073 sequences is shown. For H7, we did not estimate the date of divergence from the closest  
1074 reference sequences. (D) The time difference between the tMRCA of the Australian  
1075 lineages and the date of separation for all HA and NA segments and lineages. Lineages  
1076 with time differences of more than 10 years are labelled. All HA and NA trees are  
1077 presented in Fig 3, Fig S3-S23.

1078

1079 **Figure 5. Viruses sequenced in this study that have signatures of recent**  
1080 **introduction.** For each segment, coloured tiles correspond to three different statuses:  
1081 singletons, first detections and well-established lineages. Singletons represent the only  
1082 detections of the lineage in Australia. In cases where two viruses from the same sampling  
1083 effort were identical and were the only detections of that lineage, they were still considered  
1084 a singleton (e.g. the NA segment of the NT/2015 viruses or the NA segment of the 8  
1085 H12N2 Ruddy Turnstone viruses from 2019, which have only ever been detected during  
1086 that sampling event). Only the A allele NS segment was detected in these viruses.  
1087 Phylogenetic examples (here excerpts from N8 and N5) are provided for each status, and  
1088 branches are coloured as in Fig 3.

1089

1090 **Figure 6. Inferred migration events of avian influenza viruses within Australia.**

1091 Locations included in each tree are marked by a white circle. Specific location names are  
1092 presented in Figure 1A, and all state names are presented in the first panel and are as  
1093 follows: VIC Victoria, NSW New South Wales, QLD Queensland, NT Northern Territory,

1094 WA Western Australia, SA South Australia and TAS Tasmania. Grey lines correspond  
1095 potential migration events that were not detected in the analysis (i.e. migration event <1).  
1096 Blue lines indicate migration events are derived from calculations of state changes  
1097 (Markov Jumps), ranging from light to dark. Arrows indicate the direction of the migration  
1098 event. As NP has more than a single discrete Australian lineage, we have generated two  
1099 independent maps reflecting the 2 largest Australian lineages of NP (Fig S25). Maps  
1100 illustrating Bayes Factors, also generated using BSSVS can be found in Fig S26, and  
1101 Markov rewards also generated in this analysis are presented in Fig S27.

1102

1103 **Figure 7. Genome constellations of (A) H5 and (B) H7 viruses.** The phylogenies  
1104 presented are time-scaled Maximum Clade Credibility Trees. Tips are coloured according  
1105 to Australian state or territory. Scale bar denotes the year of sample collection. Node bars  
1106 are the 95% HPD of node height, and posterior clade probability is presented on each  
1107 branch. Adjacent to each tree are coloured tiles where each column of tiles refers to a  
1108 segment, arranged according to size: PB2, PB1, PA, HA, NP, M, NS. We only included  
1109 tiles for viruses sequenced in this study and in cases where the tiles are blank, no  
1110 sequence was available for the segment. Different colours refer to different lineages,  
1111 whereby tile colour scheme is retained for both H5 and H7 trees. For example, for the NS  
1112 segment, viruses with an NS B lineage are coloured in orange. The viruses here fall into  
1113 five different lineage clusters of NS A, and these are presented in two different shades of  
1114 blue and green and pink. If a virus is a “mixed” infection, segments with two different  
1115 lineages or subtypes are split to illustrate this.

1116

1117 **Supporting information captions**

- 1118 Figure S1. The effect of Ct value of original samples on sequencing success
- 1119 Figure S2. Temporal distribution of sampling dates.
- 1120 Figure S3. Phylogeny of H1
- 1121 Figure S4. Phylogeny of H2
- 1122 Figure S5. Phylogeny of H3
- 1123 Figure S6. Phylogeny of H5
- 1124 Figure S7. Phylogeny of H6
- 1125 Figure S8. Phylogeny of H7
- 1126 Figure S9. Phylogeny of H8
- 1127 Figure S10. Phylogeny of H9
- 1128 Figure S11. Phylogeny of H10
- 1129 Figure S12. Phylogeny of H12
- 1130 Figure S13. Phylogeny of H13
- 1131 Figure S14. Phylogeny of H16
- 1132 Figure S15. Phylogeny of N1
- 1133 Figure S16. Phylogeny of N2
- 1134 Figure S17. Phylogeny of N3
- 1135 Figure S18. Phylogeny of N4
- 1136 Figure S19. Phylogeny of N5
- 1137 Figure S20. Phylogeny of N6
- 1138 Figure S21. Phylogeny of N7
- 1139 Figure S22. Phylogeny of N8
- 1140 Figure S23. Phylogeny of N9
- 1141 Figure S24. Maximum likelihood trees for “internal segments”
- 1142 Figure S25. Data underlying phylogeography assessments of NP
- 1143 Figure S26. Bayes factor support for migration events
- 1144 Figure S27. Markov Rewards for each segment presented in Fig 7
- 1145 Figure S28. Diversity of the “internal” segments for each sampled location
- 1146 Table S1. Metadata associated with viral genomes generated in this study
- 1147 Table S2. Details of mixed viruses detected in this study
